# Supplementary material
Source: ML conference proceedings conference paper supplement (https://openaccess.thecvf.com/content/ICCV2023/html/Kim_Calibrating_Panoramic_Depth_Estimation_for_Practical_Localization_and_Mapping_ICCV_2023_paper.html)
Supplement: Supplementary file 1 [file Kim_Calibrating_Panoramic_Depth_Estimation_for_Practical_Localization_and_Mapping_ICCV_2023_supplemental.pdf]

# Supplementary Material

## Calibrating Panoramic Depth Estimation for Practical Localization and Mapping

Junho Kim<sup>1</sup>, Eun Sun Lee<sup>1</sup>, and Young Min Kim<sup>1,2</sup>

<sup>1</sup> Dept. of Electrical and Computer Engineering, Seoul National University

<sup>2</sup> Interdisciplinary Program in Artificial Intelligence and INMC, Seoul National University

{82magnolia, eunsunlee, youngmin.kim}@snu.ac.kr

### A. Implementation Details

#### A.1. Loss Functions for Test-Time Training

As explained in Section 3.1, our calibration method involves fine-tuning the depth estimation network using three training objectives. In this section we explain how each objective is implemented, along with the detailed hyperparameter setups.

**Stretch Loss** The goal of stretch loss is to mitigate the domain gap that occurs from depth scale changes in small or large scenes as shown in Figure B.2. The loss minimizes the difference between the stretched depth values against the original depth prediction, namely

$$\mathcal{L}_S = \begin{cases} \sum_{k \in \mathcal{K}_s} \|\hat{D} - \mathcal{S}_{\text{dpt}}^{1/k}(F_{\Theta}(\mathcal{S}_{\text{img}}^k(I)))\|_2 & \text{if } \text{avg}(\hat{D}) < \delta_1 \\ \sum_{k \in \mathcal{K}_l} \|\hat{D} - \mathcal{S}_{\text{dpt}}^{1/k}(F_{\Theta}(\mathcal{S}_{\text{img}}^k(I)))\|_2 & \text{if } \text{avg}(\hat{D}) > \delta_2 \\ 0 & \text{otherwise,} \end{cases} \quad (1)$$

where  $\text{avg}(\hat{D})$  is the pixel-wise average for the depth map  $\hat{D} = F_{\Theta}(I)$ , and  $\mathcal{K}_l = \{\sigma, \sigma^2\}$ ,  $\mathcal{K}_s = \{1/\sigma, 1/\sigma^2\}$  are the stretch factors used for contracting and enlarging panoramas. We use the publicly available codebase from Sun et al. [23] to implement the stretching operations  $\mathcal{S}_{\text{img}}^k, \mathcal{S}_{\text{dpt}}^k$ , and set  $\delta_1=1, \delta_2=2.5, \sigma=0.8$ .

**Chamfer and Normal Loss** Along with stretch loss that enforces scale consistency, Chamfer loss and Normal loss impose fine-grained geometric consistency. Both losses operate by creating synthetic views rendered at random translations and rotations, where we adapt the codebase of Zioulis et al. [26] to implement the rendering operation. First, given a panorama image  $I$ , Chamfer loss is given as follows,

$$\mathcal{L}_C = \sum_{\mathbf{x} \in \mathcal{B}(\hat{D})} \min_{\mathbf{y} \in \mathcal{B}(D_{\text{warp}})} \|\tilde{R}\mathbf{x} + \tilde{t} - \mathbf{y}\|_2^2, \quad (2)$$

where  $\mathcal{B}(\hat{D})$  is the point cloud created from the original depth prediction and  $\mathcal{B}(D_{\text{warp}}) = \mathcal{B}(F_{\Theta}(\mathcal{W}(I, \hat{D}; \tilde{R}, \tilde{t})))$  is the point cloud from the depth prediction made at a synthesized view from a randomly chosen pose  $\tilde{R}, \tilde{t}$  near the origin. We implement the Chamfer loss using the `chamfer_distance` function from the PyTorch3D library [19].

The Normal loss imbues an additional level of geometric consistency by aligning the normal vectors between the predictions for the original and synthetic views. The Normal loss is defined as follows,

$$\mathcal{L}_N = \sum_{\mathbf{x} \in \mathcal{B}(\hat{D})} (\tilde{R}\mathcal{N}(\mathbf{x}) \cdot (\tilde{R}\mathbf{x} + \tilde{t} - \underset{\mathbf{y} \in \mathcal{B}(D_{\text{warp}})}{\text{argmin}} \|\tilde{R}\mathbf{x} + \tilde{t} - \mathbf{y}\|_2))^2 \quad (3)$$

where  $D_{\text{warp}}$  is a depth map from an arbitrary translation and rotation  $\tilde{R}, \tilde{t}$ , and  $\mathcal{N}(\mathbf{x})$  is the normal vector at point  $\mathbf{x}$ . We implement the Normal loss using the `estimate_pointcloud_normals` function from PyTorch3D [19] and set the number of ball queries as 15.

#### A.2. Robot Navigation

We implement the navigation agent similar to Active Neural SLAM [7] and use the Habitat simulator [21] for evaluating the application of our calibration method on robot navigation. As explained in Section 4.1, we consider an agent that receives a panorama image and noisy odometry sensor reading as inputs and draws an occupancy grid map. While the original implementation of Active Neural SLAM [7] trains the entire set of navigation modules end-to-end, we use the pre-trained depth estimation network  $F_{\Theta}$  from Albanis et al. [2] and only train the policy network  $P_{\Psi}$  and pose estimator network  $C_{\Phi}$  on the Gibson training split [21]. For depth calibration, the augmentation factor is  $N_{\text{aug}} = 10$  in all our experiments. The test-time training process caches images as shown in Figure 3, using the first  $N_{\text{fwd}} = 25$  images for the exploration and SLAM tasks and

$N_{\text{fwd}} = 3$  images for the point goal navigation task. We use a larger number of cached images for exploration and SLAM tasks as the tasks generally take longer steps compared to the point goal task.

### A.3. Map-Free Localization

We implement a structure-based localization method [20] based on the setup explained in Section 4.2. The query image  $I_q$  is localized against a small 3D map  $\mathcal{B}(\hat{D}_{\text{ref}})$  created from a reference image  $I_{\text{ref}}$ . To elaborate, we first generate synthetic panoramas at  $N_t \times N_r$  poses and global/local features. During localization, the features are compared against the query image features to choose candidate poses and refine them using PnP-RANSAC [16, 10]. In our implementation, we use NetVLAD [3] for global features and SuperPoint [9] for local features, which are both widely used for visual localization [5, 20]. Further, we set the number of translations as  $N_t = 100$  and rotations as  $N_r = 8$ . For rotations, we assume that the gravity direction is known and generate  $N_r$  rotation matrices by only varying the yaw angle values.

## B. Additional Experimental Details and Results

### B.1. Baseline Comparison in Depth Estimation

In Section 5.1, we establish comparisons against various baselines for depth estimation amidst domain changes. For evaluation we use the Stanford 2D-3D-S [4] and OmniScenes [13] datasets. Note for OmniScenes we use the ‘turtlebot’ split as other splits contain moving human hands and bodies whose ground-truth depth values are not available. Below we elaborate on the domain and baseline setups, and provide the additional experimental results of depth estimation.

#### B.1.1 Domain Setup

**Online Adaptation** For online adaptation, we evaluate our method in 10 domain shifts using the Stanford 2D-3D-S [4] and OmniScenes [13] datasets. The domain shifts shown in Figure 5 are implemented as follows:

- **Dataset Shift:** We do not apply any additional transformations to the images. The images from the tested datasets are directly used for evaluation.
- **Low Lighting:** We lower each pixel intensity by 25%.
- **White Balance:** We apply the following transformation matrix to the raw RGB color values:

$$\begin{pmatrix} 0.7 & 0 & 0 \\ 0 & 0.9 & 0 \\ 0 & 0 & 0.8 \end{pmatrix}.$$

- **Gamma:** We set the image gamma to 1.5.
- **Speckle:** We use the `random_noise` function from the `scikit-image` library, where we set the speckle noise variance parameter to 0.06.
- **Gaussian:** We use the same library as in speckle noise, where we set the Gaussian noise variance parameter to 0.005.
- **Salt and Pepper:** We use the same library as in speckle noise, where we randomly perturb 0.5% of the image pixels.
- **Large Scene:** For OmniScenes [13], we select the `wedding`, `lounge`, and `lobby` scenes and for Stanford 2D-3D-S [4] we select all rooms labelled as `hallway` and `auditorium`.
- **Small Scene:** For OmniScenes [13], we select the `bride_room`, `makeup_room`, and `pyebaek` scenes and for Stanford 2D-3D-S [4] we select all rooms labelled as `pantry`, `WC`, `storage_room` and `copy_room`.
- **Rotations:** We apply a random rotation on the test images with yaw angles sampled from  $\mathcal{U}(-\pi, \pi)$ , roll angles sampled from  $\mathcal{U}(-\pi/8, \pi/8)$ , and pitch angles sampled from  $\mathcal{U}(-\pi/8, \pi/8)$ .

**Offline Adaptation** For offline adaptation, we separately evaluate depth estimation in each room for OmniScenes [13] and Stanford 2D-3D-S [4]. Specifically, we select 5% or 10% of panorama images in each room for training, and evaluate using the remaining images. Note that for the Stanford 2D-3D-S dataset, many rooms contain less than 20 panoramas, which means that often only a *single* image is used for adaptation. To cope with data scarcity, we apply data augmentation from Section 3.2 for  $N_{\text{aug}} = 20$  times in the 5% case and  $N_{\text{aug}} = 10$  times in the 10% case to increase the test-time training data.

#### B.1.2 Baseline Setup

For evaluating our calibration method, we test against seven baselines in the main paper. Here we elaborate on the implementations of each baseline, along with three additional baselines which we make detailed comparisons in Section B.1.3. In the offline setup, all baselines are trained for a single epoch to ensure fair comparison.

**Tent and Batch Normalization Statistics Update** Introduced by Wang et al. [24], Tent proposes to only train the affine parameters from the batch normalization layer during test-time training. Similar to Tent, Schneider et al. [22] propose to only update the batch normalization statistics during

adaptation. We adapt both baselines to our setup while for Tent we modify the original entropy-based training objective to our training objective in Equation 1 to accommodate for the task change from classification to depth prediction.

**Flip Consistency** Originally developed for self-supervised visual odometry [17], flip consistency imposes consistency against the flipped input image. Formally, the baseline minimizes the flip consistency loss given as follows,

$$\mathcal{L}_{\text{flip}} = \|F_{\Theta}(\mathcal{T}_{\text{flip}}(I)) - \mathcal{T}_{\text{flip}}(F_{\Theta}(I))\|_2, \quad (4)$$

where  $\mathcal{T}_{\text{flip}}(\cdot)$  is the horizontal flipping operation.

**Mask Consistency** Inspired from Mate [18], the mask consistency baseline operates by first creating a randomly masked image and imposing depth consistency against the original prediction. Let  $\tilde{M} \in \mathbb{R}^{H \times W}$  denote the random mask generated for each test sample. Then, the baseline is trained with the following objective,

$$\mathcal{L}_{\text{mask}} = \|\tilde{M} \circ F_{\Theta}(I) - \tilde{M} \circ F_{\Theta}(\tilde{M} \circ I)\|_2, \quad (5)$$

where  $\circ$  is the member-wise product operation. We implement the random masking operation by first splitting the input panorama into  $N_h \times N_w$  square patches and randomly discarding 10% of the patches, where we set  $N_h = 4$ ,  $N_w = 8$ .

**Photometric Consistency** Similar to the loss functions often used for self-supervised depth estimation [11, 14], the photometric consistency baseline imposes consistency between the synthesized view using depth estimation results and the original view. The baseline first generates a synthetic panorama located at translation  $\tilde{t}$  and rotation  $\tilde{R}$  from the origin, namely  $I_{\text{warp}} = \mathcal{W}(I, \tilde{D}; \tilde{R}, \tilde{t})$ . Then, the baseline minimizes the following loss,

$$\mathcal{L}_{\text{photo}} = \|I - \mathcal{W}(I_{\text{warp}}, D_{\text{warp}}; \tilde{R}^{-1}, \tilde{t}^{-1})\|_2, \quad (6)$$

where  $D_{\text{warp}}$  is the depth estimation using  $I_{\text{warp}}$ .

**Pseudo Labelling** First introduced by Lee et al. [15], the pseudo labelling baseline creates a pseudo ground-truth by aggregating depth predictions made at various rotated panoramas. Formally, the baseline minimizes the following objective,

$$\mathcal{L} = \|F_{\Theta}(I) - \frac{1}{K} \sum_{k=1}^K \mathcal{T}_{\text{rot}}(F_{\Theta}(\mathcal{T}_{\text{rot}}(I, \frac{2\pi}{K})), -\frac{2\pi}{K})\|_2 \quad (7)$$

where  $\mathcal{T}_{\text{rot}}(I, 2\pi/K)$  denotes the horizontal rotation of the input panorama  $I$  by  $2\pi/K$  rad. In all our experiments we set  $K = 4$ .

**Unsupervised Domain Adaptation** We consider three unsupervised domain adaptation baselines: vanilla T<sup>2</sup>Net, CrDoCo [8], and feature consistency [1]. All three baselines use the original source domain dataset during adaptation, which is the Matterport3D [6] dataset in our implementation. For each test sample, we randomly sample an image and ground-truth depth pair  $(\tilde{I}_{\text{src}}, \tilde{D}_{\text{src}})$  and use them for adapting the network to the new domain. In addition, the baselines utilize a style transfer network  $F_{\text{style}}(I, I_{\text{ref}})$  that transforms the input panorama  $I$  to match the style of the reference panorama  $I_{\text{ref}}$ . We implement  $F_{\text{style}}$  based on AdaIN [12], which is a widely used method for style transfer.

First, vanilla T<sup>2</sup>Net imposes consistency between the style transferred depth prediction and the original depth prediction, namely

$$\mathcal{L}_{\text{T}^2\text{Net}} = \|F_{\Theta}(F_{\text{style}}(I_{\text{src}}, I)) - D_{\text{src}}\|_2. \quad (8)$$

Note that here the source domain image  $I_{\text{src}}$  is transformed to match the style of the target domain image  $I$ . While the original T<sup>2</sup>Net imposes an additional set of adversarial losses based on GANs [25], we omit those losses and hence the baseline is named *vanilla* T<sup>2</sup>Net. As our setup does not target a single transition from sim-to-real but a wide range of domain shifts and the number of test data is highly limited, it is infeasible to train a set of generators and discriminators for each domain shift.

CrDoCo [8] builds upon vanilla T<sup>2</sup>Net and imposes an additional cross-domain consistency loss, namely

$$\mathcal{L}_{\text{CrDoCo}} = \mathcal{L}_{\text{T}^2\text{Net}} + \|F_{\Theta}(F_{\text{style}}(I, I_{\text{src}})) - F_{\Theta}(I)\|_2. \quad (9)$$

Conceptually, the new loss of CrDoCo transforms the target domain image to match the source domain image. It enforces the original depth prediction  $F_{\Theta}(I)$  to follow the transformed prediction.

Finally, the feature consistency baseline [1] imposes an additional loss to impose consistency between the intermediate activations of the depth prediction network. This could be expressed as follows,

$$\begin{aligned} \mathcal{L}_{\text{feat}} = \mathcal{L}_{\text{CrDoCo}} &+ \|F_{\Theta}^{\text{inter}}(F_{\text{style}}(I, I_{\text{src}})) - F_{\Theta}^{\text{inter}}(I)\|_2 \\ &+ \|F_{\Theta}^{\text{inter}}(F_{\text{style}}(I_{\text{src}}, I)) - F_{\Theta}^{\text{inter}}(I_{\text{src}})\|_2, \end{aligned} \quad (10)$$

where  $F_{\Theta}^{\text{inter}}$  is the intermediate layer activations of the depth estimation network  $F_{\Theta}$ .

**Ground-Truth Training** To measure the upper-bound performance, we finally consider a baseline that uses the ground-truth data from the target domain. Specifically, the ground-truth training baseline minimizes the following loss,

$$\mathcal{L}_{\text{gt}} = \|F_{\Theta}(I) - D_{\text{gt}}\|_2, \quad (11)$$

where  $D_{\text{gt}}$  is the ground-truth depth map for image  $I$ .

| Method           | Area (m <sup>2</sup> ) | Collisions  | Method           | PSNR          |
|------------------|------------------------|-------------|------------------|---------------|
| No Adaptation    | 28.4169                | 7822        | No Adaptation    | 7.2667        |
| Flip Consistency | 28.8958                | <b>6440</b> | Flip Consistency | 7.4840        |
| Mask Consistency | 28.8796                | 7481        | Mask Consistency | 7.5850        |
| Pseudo Labelling | 27.9863                | 7324        | Pseudo Labelling | 7.5000        |
| Ours             | <b>30.5147</b>         | 6589        | Ours             | <b>7.8404</b> |

(a) Exploration

(b) SLAM w/ Fixed Trajectory

Table B.1: Additional metrics for the exploration and SLAM task in robot navigation.

### B.1.3 Full Experimental Results

We report the full experimental results for depth estimation, where we present results from i) Stanford 2D-3D-S [4], ii) OmniScenes [13], and iii) the aggregated total results. Here we compare our calibration method against the baselines using six metrics, namely mean absolute error (MAE), absolute relative difference (Abs. Rel.), squared relative difference (Sq. Rel.), root mean squared error (RMSE), log root mean squared error (RMSE (Log)), and inlier ratio. Each metric is defined as follows:

- **MAE:**  $\sum_{u,v} \frac{|D[u,v] - D_{gt}[u,v]|}{H*W}$
- **Abs. Rel.:**  $\sum_{u,v} \frac{|D[u,v] - D_{gt}[u,v]|}{H*W*D_{gt}[u,v]}$
- **Sq. Rel.:**  $\sum_{u,v} \frac{|D[u,v] - D_{gt}[u,v]|^2}{H*W*D_{gt}[u,v]}$
- **RMSE:**  $\sqrt{\sum_{u,v} \frac{|D[u,v] - D_{gt}[u,v]|^2}{H*W}}$
- **RMSE (Log):**  $\sqrt{\sum_{u,v} \frac{|\log D[u,v] - \log D_{gt}[u,v]|^2}{H*W}}$
- **Inlier Ratio:**  $\sum_{u,v} \frac{1}{H*W} \mathbb{1}\{\max(\frac{D[u,v]}{D_{gt}[u,v]}, \frac{D_{gt}[u,v]}{D[u,v]}) < \lambda\}$ , where  $\lambda$  is a pre-defined inlier threshold.

As shown in Table B.4 to Table B.39, our method outperforms most of the baselines in all tested metrics. We also display visualizations of the depth values before and after adaptation in Figure B.2, where our adaptation scheme can largely alleviate the quality deterioration from domain shifts. The depth estimation results suggest that our calibration method can serve as an effective enhancement scheme in practical depth estimation scenarios.

### B.1.4 Loss Function Comparison

We additionally establish comparisons between the loss functions used in our calibration method (normal, stretch, Chamfer) against the loss functions used in the baselines. To this end we run a small experiment where we evaluate offline adaptation on two rooms in OmniScenes [13] (Room 5 and Wedding Hall) using 10% of the available images for training and the rest for testing. Here Room 5 exemplifies the ‘dataset shift’ case, whereas Wedding Hall exemplifies

| Loss Function    | Room 5        | Wedding Hall  |
|------------------|---------------|---------------|
| No Adaptation    | 0.4839        | 1.1704        |
| Flip             | 0.4605        | 1.2746        |
| Mask             | 0.3644        | 1.3302        |
| Photometric      | 0.4889        | 1.1177        |
| Pseudo Labelling | 0.4435        | 1.2935        |
| Normal           | <b>0.2699</b> | 1.3437        |
| Stretch          | 0.4741        | <b>0.9167</b> |
| Chamfer          | 0.2917        | 1.3537        |

Table B.2: Mean absolute error of various test-time training loss functions measured from rooms in OmniScenes [13].

the ‘large scene’ case explained from Section B.1.1. We additionally apply an augmentation for each loss function by  $N_{aug} = 10$  and measure the mean absolute error on the test samples. As shown in Table B.2, both normal loss and Chamfer loss outperform the other loss functions in Room 5 while stretch loss shows large improvements in the wedding hall scene. The fine-grained geometric consistencies from normal and Chamfer loss, along with the scale consistencies imposed from stretch loss enable our calibration method to function in a wide variety of depth estimation scenarios.

## B.2. Robot Navigation

**Experimental Setup** In all our experiments, we set the maximum number of steps per episode to 500, while the point goal navigation task terminates whenever the agent stops within 0.2m of its estimated goal position. Also, note that the Chamfer distance metric shown in Table 2b is measured by treating the occupied regions in the grid map as a 2D point cloud. For the SLAM task under fixed trajectory shown in Table 2b, we collect the trajectories by having the ‘No Adaptation’ robot agent to explore in each episode for 500 steps.

**Additional Results** We report additional metrics and visualizations for the exploration and SLAM tasks in Table B.1 and Figure B.1. First, we show the average explored area and the total number of collisions occurred during exploration. Our method achieves the highest explored area while exhibiting a lower collision count than most of the competing methods. In addition, we display the PSNR between the estimated grid maps and the ground truth, where our method attains the highest grid map similarity. This is further verified through the qualitative samples in Figure B.1, where the grid map generated using our calibration scheme best aligns with the ground-truth. Therefore, our method could effectively function in various robot navigation tasks to enhance their performance in challenging deployment scenarios.

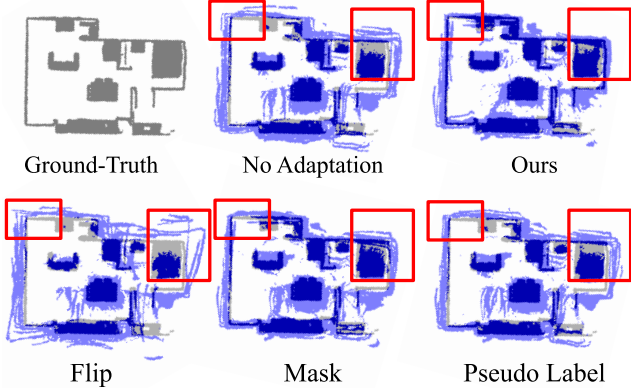

Figure B.1: Qualitative result of grid maps from navigation task. We display the ground-truth map (grey) and the estimated grid map (blue) from the same sequence of actions.

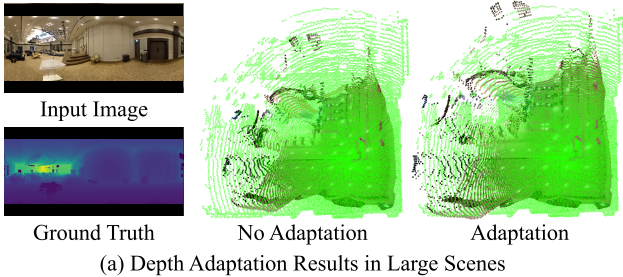

(a) Depth Adaptation Results in Large Scenes

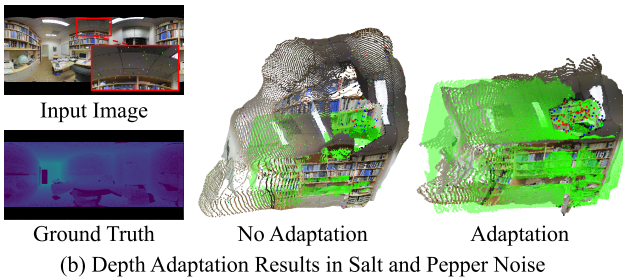

(b) Depth Adaptation Results in Salt and Pepper Noise

Figure B.2: Qualitative visualization of depth estimation before and after adaptation. We overlay the ground-truth depth values in green.

### B.3. Map-Free Localization

As explained in Section 5.3, we evaluate map-free localization by querying 10 images that are captured within a distance threshold  $\delta = 2\text{m}$  of each reference image. Also, for test-time training we augment the data by  $N_{\text{aug}} = 20$  and cope with data scarcity. In this section we additionally report results for  $\delta = 1, 3\text{m}$ . Table B.3 shows the localization results at various distance thresholds, where our method outperforms the baselines in most tested setups. Along with robot navigation, our method demonstrates large amounts of performance enhancements in map-free localization, where the refined geometry of the depth maps play a crucial role for accurate localization.

| Method       | $t$ -error (m) | $R$ -error ( $^\circ$ ) | Accuracy (0.1m, 5 $^\circ$ ) | Accuracy (0.2m, 10 $^\circ$ ) |
|--------------|----------------|-------------------------|------------------------------|-------------------------------|
| No Adatation | 0.09           | <b>0.54</b>             | 0.54                         | 0.96                          |
| Flip         | 0.09           | 0.58                    | 0.57                         | 0.98                          |
| Mask         | 0.07           | 0.58                    | 0.66                         | 0.98                          |
| CrDoCo       | 0.07           | 0.61                    | 0.70                         | <b>0.99</b>                   |
| SSL          | 0.08           | 0.61                    | 0.58                         | 0.95                          |
| Ours         | <b>0.05</b>    | 0.60                    | <b>0.83</b>                  | 0.96                          |

(a) Query images within 1m of reference image

| Method       | $t$ -error (m) | $R$ -error ( $^\circ$ ) | Accuracy (0.1m, 5 $^\circ$ ) | Accuracy (0.2m, 10 $^\circ$ ) |
|--------------|----------------|-------------------------|------------------------------|-------------------------------|
| No Adatation | 0.26           | 1.35                    | 0.20                         | 0.42                          |
| Flip         | 0.22           | 1.26                    | 0.24                         | 0.46                          |
| Mask         | 0.19           | 1.43                    | 0.29                         | 0.51                          |
| CrDoCo       | 0.19           | 1.41                    | 0.31                         | 0.53                          |
| SSL          | 0.23           | 1.38                    | 0.24                         | 0.46                          |
| Ours         | <b>0.15</b>    | <b>1.13</b>             | <b>0.38</b>                  | <b>0.60</b>                   |

(b) Query images within 3m of reference image

Table B.3: Additional results of map-free visual localization compared against the baselines in OmniScenes [13]. Note that the translation and rotation error thresholds for calculating accuracy is denoted as  $(d\text{ m}, \theta^\circ)$ .

## References

- [1] Hiroyasu Akada, S. Bhat, Ibraheem Alhashim, and Peter Wonka. Self-supervised learning of domain invariant features for depth estimation. *2022 IEEE/CVF Winter Conference on Applications of Computer Vision (WACV)*, pages 997–1007, 2021.
- [2] Georgios Albanis, Nikolaos Zioulis, Petros Drakoulis, V. Gkitsas, Vladimiro Sterzentsenko, Federico Álvarez, Dimitrios Zarpalas, and Petros Daras. Pano3d: A holistic benchmark and a solid baseline for 360 $^\circ$  depth estimation. *2021 IEEE/CVF Conference on Computer Vision and Pattern Recognition Workshops (CVPRW)*, pages 3722–3732, 2021.
- [3] R. Arandjelović, P. Gronat, A. Torii, T. Pajdla, and J. Sivic. NetVLAD: CNN architecture for weakly supervised place recognition. In *IEEE Conference on Computer Vision and Pattern Recognition*, 2016.
- [4] Iro Armeni, Sasha Sax, Amir R Zamir, and Silvio Savarese. Joint 2d-3d-semantic data for indoor scene understanding. *arXiv preprint arXiv:1702.01105*, 2017.
- [5] Eduardo Arnold, Jamie Wynn, Sara Vicente, Guillermo Garcia-Hernando, Áron Monszpart, Victor Prisacariu, Daniyar Turmukhambetov, and Eric Brachmann. Map-free visual relocalization: Metric pose relative to a single image. In *Computer Vision–ECCV 2022: 17th European Conference, Tel Aviv, Israel, October 23–27, 2022, Proceedings, Part I*, pages 690–708. Springer, 2022.
- [6] Angel Chang, Angela Dai, Thomas Funkhouser, Maciej Halber, Matthias Niessner, Manolis Savva, Shuran Song, Andy Zeng, and Yinda Zhang. Matterport3d: Learning from rgb-d data in indoor environments. *International Conference on 3D Vision (3DV)*, 2017.
- [7] Devendra Singh Chaplot, Dhiraj Gandhi, Saurabh Gupta, Abhinav Gupta, and Ruslan Salakhutdinov. Learning

- to explore using active neural slam. *arXiv preprint arXiv:2004.05155*, 2020.
- [8] Yun-Chun Chen, Yen-Yu Lin, Ming-Hsuan Yang, and Jia-Bin Huang. Crdoco: Pixel-level domain transfer with cross-domain consistency. In *Proceedings of the IEEE/CVF conference on computer vision and pattern recognition*, pages 1791–1800, 2019.
- [9] Daniel DeTone, Tomasz Malisiewicz, and Andrew Rabinovich. Superpoint: Self-supervised interest point detection and description. In *CVPR Deep Learning for Visual SLAM Workshop*, 2018.
- [10] Martin A. Fischler and Robert C. Bolles. Random sample consensus: A paradigm for model fitting with applications to image analysis and automated cartography. *Commun. ACM*, 24(6):381–395, 1981.
- [11] Clément Godard, Oisín Mac Aodha, and Gabriel J. Brostow. Unsupervised monocular depth estimation with left-right consistency, 2017.
- [12] Xun Huang and Serge Belongie. Arbitrary style transfer in real-time with adaptive instance normalization. In *ICCV*, 2017.
- [13] Junho Kim, Changwoon Choi, Hojun Jang, and Young Min Kim. Piccolo: Point cloud-centric omnidirectional localization. In *Proceedings of the IEEE/CVF International Conference on Computer Vision (ICCV)*, pages 3313–3323, October 2021.
- [14] Marvin Klingner, Jan-Aike Termöhlen, Jonas Mikolajczyk, and Tim Fingscheidt. Self-Supervised Monocular Depth Estimation: Solving the Dynamic Object Problem by Semantic Guidance. In *European Conference on Computer Vision (ECCV)*, 2020.
- [15] Dong-Hyun Lee. Pseudo-label : The simple and efficient semi-supervised learning method for deep neural networks. *ICML 2013 Workshop : Challenges in Representation Learning (WREPL)*, 07 2013.
- [16] Vincent Lepetit, Francesc Moreno-Noguer, and Pascal Fua. Epnp: An accurate o(n) solution to the pnp problem. *International Journal Of Computer Vision*, 81:155–166, 2009.
- [17] Bin Li, Mu Hu, Shuling Wang, Lianghao Wang, and Xiaojin Gong. Self-supervised visual-lidar odometry with flip consistency. In *Proceedings of the IEEE/CVF Winter Conference on Applications of Computer Vision*, pages 3844–3852, 2021.
- [18] Muhammad Jehanzeb Mirza, Inkyu Shin, Wei Lin, Andreas Schriebl, Kunyang Sun, Jaesung Choe, Horst Possegger, Mateusz Koziński, In-So Kweon, Kun-Jin Yoon, and Horst Bischof. Mate: Masked autoencoders are online 3d test-time learners. *ArXiv*, abs/2211.11432, 2022.
- [19] Nikhila Ravi, Jeremy Reizenstein, David Novotny, Taylor Gordon, Wan-Yen Lo, Justin Johnson, and Georgia Gkioxari. Accelerating 3d deep learning with pytorch3d. *arXiv:2007.08501*, 2020.
- [20] Paul-Edouard Sarlin, Cesar Cadena, Roland Siegwart, and Marcin Dymczyk. From coarse to fine: Robust hierarchical localization at large scale. In *CVPR*, 2019.
- [21] Manolis Savva, Abhishek Kadian, Oleksandr Maksymets, Yili Zhao, Erik Wijmans, Bhavana Jain, Julian Straub, Jia Liu, Vladlen Koltun, Jitendra Malik, Devi Parikh, and Dhruv Batra. Habitat: A Platform for Embodied AI Research. In *Proceedings of the IEEE/CVF International Conference on Computer Vision (ICCV)*, 2019.
- [22] Steffen Schneider, Evgenia Rusak, Luisa Eck, Oliver Bringmann, Wieland Brendel, and Matthias Bethge. Improving robustness against common corruptions by covariate shift adaptation. *ArXiv*, abs/2006.16971, 2020.
- [23] Hao-Wen Ting, Cheng Sun, and Hwann-Tzong Chen. Self-supervised 360° room layout estimation. *ArXiv*, abs/2203.16057, 2022.
- [24] Dequan Wang, Evan Shelhamer, Shaoteng Liu, Bruno A. Olshausen, and Trevor Darrell. Tent: Fully test-time adaptation by entropy minimization. In *International Conference on Learning Representations*, 2021.
- [25] Chuanxia Zheng, Tat-Jen Cham, and Jianfei Cai. T2net: Synthetic-to-realistic translation for solving single-image depth estimation tasks. In *European Conference on Computer Vision*, 2018.
- [26] Nikolaos Zioulis, Antonis Karakottas, Dimitrios Zarpalas, Federico Álvarez, and Petros Daras. Spherical view synthesis for self-supervised 360° depth estimation. *2019 International Conference on 3D Vision (3DV)*, pages 690–699, 2019.

| Method                          | MAE    | Abs. Rel. | Sq. Rel. | RMSE   | RMSE (Log) | Inlier Ratio<br>( $\lambda = 1.25$ ) | Inlier Ratio<br>( $\lambda = 1.25^2$ ) | Inlier Ratio<br>( $\lambda = 1.25^3$ ) |
|---------------------------------|--------|-----------|----------|--------|------------|--------------------------------------|----------------------------------------|----------------------------------------|
| No Adaptation                   | 0.4339 | 0.1934    | 0.1418   | 0.6019 | 0.0953     | 0.7367                               | 0.9618                                 | 0.9861                                 |
| Schneider et al. [22]           | 0.5302 | 0.2057    | 0.2127   | 0.815  | 0.1221     | 0.6679                               | 0.9089                                 | 0.9579                                 |
| Tent [24]                       | 0.4278 | 0.1906    | 0.1388   | 0.5949 | 0.0943     | 0.7468                               | 0.9624                                 | 0.9863                                 |
| Flip Consistency                | 0.4203 | 0.1863    | 0.1341   | 0.5941 | 0.0917     | 0.7462                               | 0.9619                                 | 0.9864                                 |
| Mask Consistency                | 0.3976 | 0.1745    | 0.1232   | 0.5687 | 0.0883     | 0.7879                               | 0.962                                  | 0.9866                                 |
| Photometric Consistency         | 0.434  | 0.1958    | 0.1404   | 0.6027 | 0.0955     | 0.7235                               | 0.9643                                 | 0.987                                  |
| Pseudo Labelling                | 0.4087 | 0.1819    | 0.1281   | 0.5743 | 0.0909     | 0.7617                               | 0.9637                                 | 0.9873                                 |
| Vanilla T <sup>2</sup> Net [25] | 0.4182 | 0.1781    | 0.1334   | 0.6171 | 0.0921     | 0.7786                               | 0.9547                                 | 0.9839                                 |
| CrDoCo [8]                      | 0.4099 | 0.1797    | 0.126    | 0.5821 | 0.0907     | 0.7741                               | 0.9603                                 | 0.9864                                 |
| Feature Consistency             | 0.4152 | 0.1768    | 0.1306   | 0.6118 | 0.0915     | 0.7821                               | 0.9551                                 | 0.984                                  |
| Ground-Truth Training           | 0.3161 | 0.1411    | 0.0899   | 0.4893 | 0.0764     | 0.8621                               | 0.9758                                 | 0.991                                  |
| Ours                            | 0.3245 | 0.1448    | 0.0928   | 0.4756 | 0.0779     | 0.8686                               | 0.9714                                 | 0.989                                  |

Table B.4: Offline adaptation using 5% of the panorama images for training in the OmniScenes [13] dataset.

| Method                          | MAE    | Abs. Rel. | Sq. Rel. | RMSE   | RMSE (Log) | Inlier Ratio<br>( $\lambda = 1.25$ ) | Inlier Ratio<br>( $\lambda = 1.25^2$ ) | Inlier Ratio<br>( $\lambda = 1.25^3$ ) |
|---------------------------------|--------|-----------|----------|--------|------------|--------------------------------------|----------------------------------------|----------------------------------------|
| No Adaptation                   | 0.4345 | 0.1951    | 0.1430   | 0.6029 | 0.0953     | 0.7335                               | 0.9626                                 | 0.9866                                 |
| Schneider et al. [22]           | 0.5317 | 0.2072    | 0.2144   | 0.8169 | 0.1220     | 0.6627                               | 0.9087                                 | 0.9585                                 |
| Tent [24]                       | 0.4280 | 0.192     | 0.1396   | 0.5957 | 0.0942     | 0.7455                               | 0.9634                                 | 0.9868                                 |
| Flip Consistency                | 0.4044 | 0.1808    | 0.1263   | 0.5743 | 0.0897     | 0.7631                               | 0.9633                                 | 0.9872                                 |
| Mask Consistency                | 0.4022 | 0.1775    | 0.1252   | 0.5732 | 0.0893     | 0.7834                               | 0.9612                                 | 0.9867                                 |
| Photometric Consistency         | 0.4253 | 0.1926    | 0.1367   | 0.5845 | 0.0933     | 0.7364                               | 0.9659                                 | 0.9879                                 |
| Pseudo Labelling                | 0.4167 | 0.1846    | 0.1311   | 0.5907 | 0.0916     | 0.7580                               | 0.9630                                 | 0.9873                                 |
| Vanilla T <sup>2</sup> Net [25] | 0.4210 | 0.1806    | 0.1344   | 0.6210 | 0.0927     | 0.7738                               | 0.9536                                 | 0.9841                                 |
| CrDoCo [8]                      | 0.4112 | 0.1814    | 0.1274   | 0.5850 | 0.0911     | 0.7719                               | 0.9598                                 | 0.9865                                 |
| Feature Consistency             | 0.4192 | 0.1775    | 0.1335   | 0.6233 | 0.0925     | 0.7794                               | 0.9531                                 | 0.9836                                 |
| Ground-Truth Training           | 0.2981 | 0.1363    | 0.0813   | 0.4543 | 0.0731     | 0.8754                               | 0.9793                                 | 0.9923                                 |
| Ours                            | 0.3192 | 0.1434    | 0.0907   | 0.4674 | 0.0767     | 0.8732                               | 0.9725                                 | 0.9896                                 |

Table B.5: Offline adaptation using 10% of the panorama images for training in the OmniScenes [13] dataset.

| Method                          | MAE    | Abs. Rel. | Sq. Rel. | RMSE   | RMSE (Log) | Inlier Ratio<br>( $\lambda = 1.25$ ) | Inlier Ratio<br>( $\lambda = 1.25^2$ ) | Inlier Ratio<br>( $\lambda = 1.25^3$ ) |
|---------------------------------|--------|-----------|----------|--------|------------|--------------------------------------|----------------------------------------|----------------------------------------|
| No Adaptation                   | 0.4334 | 0.1946    | 0.1431   | 0.6030 | 0.0957     | 0.7362                               | 0.9616                                 | 0.9863                                 |
| Schneider et al. [22]           | 0.4053 | 0.1555    | 0.1368   | 0.7470 | 0.1028     | 0.8033                               | 0.9487                                 | 0.9794                                 |
| Tent [24]                       | 0.4198 | 0.1848    | 0.1355   | 0.6320 | 0.0955     | 0.7727                               | 0.9608                                 | 0.9859                                 |
| Flip Consistency                | 0.4700 | 0.1903    | 0.1628   | 0.8111 | 0.1059     | 0.7318                               | 0.9372                                 | 0.9742                                 |
| Mask Consistency                | 0.4898 | 0.2069    | 0.1705   | 0.8097 | 0.1095     | 0.6713                               | 0.9324                                 | 0.9731                                 |
| Photometric Consistency         | 0.4498 | 0.2083    | 0.1479   | 0.6656 | 0.1023     | 0.6615                               | 0.9555                                 | 0.9862                                 |
| Pseudo Labelling                | 0.4533 | 0.2043    | 0.1493   | 0.7110 | 0.1035     | 0.6910                               | 0.9464                                 | 0.9801                                 |
| Vanilla T <sup>2</sup> Net [25] | 0.4025 | 0.1767    | 0.1259   | 0.6345 | 0.0936     | 0.7909                               | 0.9563                                 | 0.9831                                 |
| CrDoCo [8]                      | 0.4989 | 0.2115    | 0.1779   | 0.8306 | 0.1117     | 0.6668                               | 0.9311                                 | 0.9704                                 |
| Feature Consistency             | 0.6594 | 0.2402    | 0.3025   | 1.1390 | 0.1546     | 0.5887                               | 0.8267                                 | 0.9172                                 |
| Ground-Truth Training           | 0.2243 | 0.0922    | 0.0622   | 0.4245 | 0.0619     | 0.9143                               | 0.9801                                 | 0.9930                                 |
| Ours                            | 0.3382 | 0.1433    | 0.0989   | 0.5393 | 0.0816     | 0.8432                               | 0.9667                                 | 0.9902                                 |

Table B.6: Online adaptation in dataset shift evaluated in the OmniScenes [13] dataset.

| Method                          | MAE    | Abs. Rel. | Sq. Rel. | RMSE   | RMSE (Log) | Inlier Ratio<br>( $\lambda = 1.25$ ) | Inlier Ratio<br>( $\lambda = 1.25^2$ ) | Inlier Ratio<br>( $\lambda = 1.25^3$ ) |
|---------------------------------|--------|-----------|----------|--------|------------|--------------------------------------|----------------------------------------|----------------------------------------|
| No Adaptation                   | 0.3766 | 0.2117    | 0.1378   | 0.4868 | 0.0966     | 0.7060                               | 0.9715                                 | 0.9893                                 |
| Schneider et al. [22]           | 0.3611 | 0.1944    | 0.1115   | 0.4837 | 0.0894     | 0.7520                               | 0.9797                                 | 0.9930                                 |
| Tent [24]                       | 0.3495 | 0.1977    | 0.1215   | 0.4616 | 0.0938     | 0.7643                               | 0.9740                                 | 0.9901                                 |
| Flip Consistency                | 0.2823 | 0.1727    | 0.0833   | 0.3662 | 0.0850     | 0.8193                               | 0.9782                                 | 0.9925                                 |
| Mask Consistency                | 0.3134 | 0.1999    | 0.0948   | 0.3870 | 0.0940     | 0.7231                               | 0.9710                                 | 0.9918                                 |
| Photometric Consistency         | 0.3486 | 0.2066    | 0.1201   | 0.4373 | 0.0971     | 0.7083                               | 0.9714                                 | 0.9895                                 |
| Pseudo Labelling                | 0.3498 | 0.2166    | 0.1127   | 0.4254 | 0.0983     | 0.6855                               | 0.9692                                 | 0.9910                                 |
| Vanilla T <sup>2</sup> Net [25] | 0.3286 | 0.2126    | 0.1058   | 0.3930 | 0.0975     | 0.7163                               | 0.9690                                 | 0.9911                                 |
| CrDoCo [8]                      | 0.3268 | 0.2063    | 0.0998   | 0.4068 | 0.0964     | 0.7131                               | 0.9682                                 | 0.9916                                 |
| Feature Consistency             | 0.4863 | 0.2433    | 0.2117   | 0.7122 | 0.1478     | 0.5800                               | 0.8350                                 | 0.9256                                 |
| Ground-Truth Training           | 0.1409 | 0.0835    | 0.0355   | 0.2284 | 0.0548     | 0.9411                               | 0.9863                                 | 0.9948                                 |
| Ours                            | 0.1971 | 0.1099    | 0.0498   | 0.3042 | 0.0650     | 0.9132                               | 0.9848                                 | 0.9942                                 |

Table B.7: Online adaptation in low lighting evaluated in the OmniScenes [13] dataset..

| Method                          | MAE    | Abs. Rel. | Sq. Rel. | RMSE   | RMSE (Log) | Inlier Ratio<br>( $\lambda = 1.25$ ) | Inlier Ratio<br>( $\lambda = 1.25^2$ ) | Inlier Ratio<br>( $\lambda = 1.25^3$ ) |
|---------------------------------|--------|-----------|----------|--------|------------|--------------------------------------|----------------------------------------|----------------------------------------|
| No Adaptation                   | 0.3929 | 0.2215    | 0.1412   | 0.4980 | 0.1000     | 0.6707                               | 0.9686                                 | 0.9882                                 |
| Schneider et al. [22]           | 0.3638 | 0.1952    | 0.1113   | 0.4854 | 0.0895     | 0.7459                               | 0.9805                                 | 0.9934                                 |
| Tent [24]                       | 0.3656 | 0.2072    | 0.1250   | 0.4733 | 0.0974     | 0.7315                               | 0.9711                                 | 0.9891                                 |
| Flip Consistency                | 0.2879 | 0.1727    | 0.0790   | 0.3757 | 0.0858     | 0.8123                               | 0.9768                                 | 0.9919                                 |
| Mask Consistency                | 0.3261 | 0.2037    | 0.0976   | 0.4063 | 0.0958     | 0.7104                               | 0.9696                                 | 0.9913                                 |
| Photometric Consistency         | 0.3948 | 0.2368    | 0.1348   | 0.4736 | 0.1054     | 0.5850                               | 0.9678                                 | 0.9895                                 |
| Pseudo Labelling                | 0.3400 | 0.2120    | 0.1041   | 0.4097 | 0.0973     | 0.7001                               | 0.9695                                 | 0.9911                                 |
| Vanilla T <sup>2</sup> Net [25] | 0.3381 | 0.2128    | 0.1056   | 0.4033 | 0.0968     | 0.7219                               | 0.9720                                 | 0.9915                                 |
| CrDoCo [8]                      | 0.3301 | 0.2085    | 0.0999   | 0.4066 | 0.0968     | 0.7103                               | 0.9690                                 | 0.9914                                 |
| Feature Consistency             | 0.4502 | 0.2350    | 0.1839   | 0.6507 | 0.1348     | 0.6048                               | 0.8644                                 | 0.9497                                 |
| Ground-Truth Training           | 0.1445 | 0.0850    | 0.0355   | 0.2338 | 0.0560     | 0.9359                               | 0.9855                                 | 0.9944                                 |
| Ours                            | 0.2107 | 0.1154    | 0.0519   | 0.3228 | 0.0679     | 0.9006                               | 0.9833                                 | 0.9936                                 |

Table B.8: Online adaptation in white balance change evaluated in the OmniScenes [13] dataset..

| Method                          | MAE    | Abs. Rel. | Sq. Rel. | RMSE   | RMSE (Log) | Inlier Ratio<br>( $\lambda = 1.25$ ) | Inlier Ratio<br>( $\lambda = 1.25^2$ ) | Inlier Ratio<br>( $\lambda = 1.25^3$ ) |
|---------------------------------|--------|-----------|----------|--------|------------|--------------------------------------|----------------------------------------|----------------------------------------|
| No Adaptation                   | 0.3782 | 0.2116    | 0.1269   | 0.4778 | 0.0946     | 0.7262                               | 0.9754                                 | 0.9910                                 |
| Schneider et al. [22]           | 0.3615 | 0.1941    | 0.1104   | 0.4831 | 0.0891     | 0.7509                               | 0.9810                                 | 0.9934                                 |
| Tent [24]                       | 0.3474 | 0.1957    | 0.1108   | 0.4477 | 0.0911     | 0.7835                               | 0.9776                                 | 0.9917                                 |
| Flip Consistency                | 0.3026 | 0.1886    | 0.0861   | 0.3696 | 0.0883     | 0.7824                               | 0.9791                                 | 0.9930                                 |
| Mask Consistency                | 0.3281 | 0.2068    | 0.0958   | 0.3980 | 0.0952     | 0.6991                               | 0.9736                                 | 0.9927                                 |
| Photometric Consistency         | 0.3681 | 0.2283    | 0.1267   | 0.4361 | 0.1012     | 0.6431                               | 0.9734                                 | 0.9911                                 |
| Pseudo Labelling                | 0.3248 | 0.2018    | 0.0946   | 0.3890 | 0.0920     | 0.7500                               | 0.9768                                 | 0.9928                                 |
| Vanilla T <sup>2</sup> Net [25] | 0.3031 | 0.1921    | 0.0883   | 0.3667 | 0.0896     | 0.7788                               | 0.9782                                 | 0.9926                                 |
| CrDoCo [8]                      | 0.3105 | 0.1954    | 0.0886   | 0.3855 | 0.0915     | 0.7581                               | 0.9751                                 | 0.9926                                 |
| Feature Consistency             | 0.3747 | 0.1998    | 0.1324   | 0.5403 | 0.1115     | 0.6917                               | 0.9159                                 | 0.9758                                 |
| Ground-Truth Training           | 0.1354 | 0.0799    | 0.0325   | 0.2215 | 0.0531     | 0.9453                               | 0.9875                                 | 0.9952                                 |
| Ours                            | 0.1990 | 0.1080    | 0.0474   | 0.3112 | 0.0648     | 0.9142                               | 0.9851                                 | 0.9942                                 |

Table B.9: Online adaptation in image gamma change evaluated in the OmniScenes [13] dataset.

| Method                          | MAE    | Abs. Rel. | Sq. Rel. | RMSE   | RMSE (Log) | Inlier Ratio<br>( $\lambda = 1.25$ ) | Inlier Ratio<br>( $\lambda = 1.25^2$ ) | Inlier Ratio<br>( $\lambda = 1.25^3$ ) |
|---------------------------------|--------|-----------|----------|--------|------------|--------------------------------------|----------------------------------------|----------------------------------------|
| No Adaptation                   | 0.5290 | 0.1680    | 0.1696   | 0.8141 | 0.0975     | 0.7440                               | 0.9399                                 | 0.9789                                 |
| Schneider et al. [22]           | 0.7638 | 0.2101    | 0.3221   | 1.3617 | 0.1702     | 0.5857                               | 0.8289                                 | 0.9272                                 |
| Tent [24]                       | 0.5366 | 0.1678    | 0.1726   | 0.8776 | 0.1014     | 0.7461                               | 0.9370                                 | 0.9780                                 |
| Flip Consistency                | 0.6313 | 0.1721    | 0.2220   | 1.0901 | 0.1132     | 0.7247                               | 0.9035                                 | 0.9601                                 |
| Mask Consistency                | 0.6255 | 0.1745    | 0.2131   | 1.0730 | 0.1093     | 0.7273                               | 0.9085                                 | 0.9662                                 |
| Photometric Consistency         | 0.5512 | 0.1768    | 0.1750   | 0.8885 | 0.1013     | 0.6995                               | 0.9405                                 | 0.9815                                 |
| Pseudo Labelling                | 0.5747 | 0.1737    | 0.1857   | 0.9581 | 0.1025     | 0.7324                               | 0.9261                                 | 0.9764                                 |
| Vanilla T <sup>2</sup> Net [25] | 0.6003 | 0.1687    | 0.2001   | 1.0290 | 0.1061     | 0.7483                               | 0.9162                                 | 0.9690                                 |
| CrDoCo [8]                      | 0.6517 | 0.1825    | 0.2295   | 1.1306 | 0.1132     | 0.7116                               | 0.9027                                 | 0.9617                                 |
| Feature Consistency             | 0.8238 | 0.2163    | 0.3541   | 1.4397 | 0.1496     | 0.6082                               | 0.8331                                 | 0.9258                                 |
| Ground-Truth Training           | 0.3663 | 0.1147    | 0.1058   | 0.6516 | 0.0739     | 0.8773                               | 0.9708                                 | 0.9898                                 |
| Ours                            | 0.4790 | 0.1494    | 0.1435   | 0.7819 | 0.0911     | 0.8029                               | 0.9510                                 | 0.9855                                 |

Table B.10: Online adaptation in large scenes evaluated in the OmniScenes [13] dataset.

| Method                          | MAE    | Abs. Rel. | Sq. Rel. | RMSE   | RMSE (Log) | Inlier Ratio<br>( $\lambda = 1.25$ ) | Inlier Ratio<br>( $\lambda = 1.25^2$ ) | Inlier Ratio<br>( $\lambda = 1.25^3$ ) |
|---------------------------------|--------|-----------|----------|--------|------------|--------------------------------------|----------------------------------------|----------------------------------------|
| No Adaptation                   | 0.2921 | 0.1454    | 0.0738   | 0.4064 | 0.0750     | 0.8674                               | 0.9787                                 | 0.9931                                 |
| Schneider et al. [22]           | 0.2907 | 0.1388    | 0.0691   | 0.4183 | 0.0718     | 0.8625                               | 0.9874                                 | 0.9954                                 |
| Tent [24]                       | 0.2862 | 0.1424    | 0.0710   | 0.4029 | 0.0752     | 0.8730                               | 0.9794                                 | 0.9934                                 |
| Flip Consistency                | 0.2898 | 0.1499    | 0.0699   | 0.3888 | 0.0758     | 0.8549                               | 0.9832                                 | 0.9946                                 |
| Mask Consistency                | 0.2459 | 0.1317    | 0.0540   | 0.3321 | 0.0693     | 0.8851                               | 0.9863                                 | 0.9954                                 |
| Photometric Consistency         | 0.2560 | 0.1302    | 0.0587   | 0.3583 | 0.0702     | 0.8889                               | 0.9831                                 | 0.9943                                 |
| Pseudo Labelling                | 0.2732 | 0.1407    | 0.0624   | 0.3699 | 0.0716     | 0.8783                               | 0.9857                                 | 0.9953                                 |
| Vanilla T <sup>2</sup> Net [25] | 0.2453 | 0.1328    | 0.0542   | 0.3300 | 0.0698     | 0.8819                               | 0.9860                                 | 0.9953                                 |
| CrDoCo [8]                      | 0.2353 | 0.1269    | 0.0503   | 0.3216 | 0.0676     | 0.8905                               | 0.9863                                 | 0.9953                                 |
| Feature Consistency             | 0.2665 | 0.1283    | 0.0606   | 0.3835 | 0.0763     | 0.8547                               | 0.9759                                 | 0.9904                                 |
| Ground-Truth Training           | 0.1809 | 0.0930    | 0.0343   | 0.2679 | 0.0562     | 0.9325                               | 0.9877                                 | 0.9954                                 |
| Ours                            | 0.2121 | 0.1058    | 0.0428   | 0.3119 | 0.0624     | 0.9139                               | 0.9857                                 | 0.9946                                 |

Table B.11: Online adaptation in small scenes evaluated in the OmniScenes [13] dataset.



| Method                          | MAE    | Abs. Rel. | Sq. Rel. | RMSE   | RMSE (Log) | Inlier Ratio<br>( $\lambda = 1.25$ ) | Inlier Ratio<br>( $\lambda = 1.25^2$ ) | Inlier Ratio<br>( $\lambda = 1.25^3$ ) |
|---------------------------------|--------|-----------|----------|--------|------------|--------------------------------------|----------------------------------------|----------------------------------------|
| No Adaptation                   | 0.4585 | 0.2720    | 0.2294   | 0.6489 | 0.1443     | 0.5798                               | 0.8498                                 | 0.9426                                 |
| Schneider et al. [22]           | 0.4867 | 0.2878    | 0.2346   | 0.6636 | 0.1491     | 0.5088                               | 0.8310                                 | 0.9432                                 |
| Tent [24]                       | 0.4419 | 0.2570    | 0.2021   | 0.6299 | 0.1413     | 0.5924                               | 0.8583                                 | 0.9469                                 |
| Flip Consistency                | 0.4128 | 0.2389    | 0.1609   | 0.6048 | 0.1270     | 0.6184                               | 0.8907                                 | 0.9652                                 |
| Mask Consistency                | 0.4368 | 0.2358    | 0.1746   | 0.6737 | 0.1352     | 0.6165                               | 0.8678                                 | 0.9526                                 |
| Photometric Consistency         | 0.4316 | 0.2574    | 0.1929   | 0.6076 | 0.1338     | 0.5979                               | 0.8788                                 | 0.9593                                 |
| Pseudo Labelling                | 0.4421 | 0.2413    | 0.1786   | 0.6687 | 0.1364     | 0.6013                               | 0.8667                                 | 0.9536                                 |
| Vanilla T <sup>2</sup> Net [25] | 0.4044 | 0.2565    | 0.1891   | 0.5642 | 0.1298     | 0.6314                               | 0.8880                                 | 0.9613                                 |
| CrDoCo [8]                      | 0.4214 | 0.2265    | 0.1668   | 0.6600 | 0.1314     | 0.6457                               | 0.8741                                 | 0.9555                                 |
| Feature Consistency             | 0.6067 | 0.2913    | 0.2990   | 0.9284 | 0.2001     | 0.4699                               | 0.7231                                 | 0.8552                                 |
| Ground-Truth Training           | 0.2604 | 0.1583    | 0.0864   | 0.3917 | 0.0916     | 0.7987                               | 0.9488                                 | 0.9833                                 |
| Ours                            | 0.4089 | 0.2106    | 0.1486   | 0.6182 | 0.1324     | 0.6070                               | 0.8686                                 | 0.9593                                 |

Table B.12: Online adaptation in camera rotations evaluated in the OmniScenes [13] dataset.

| Method                          | MAE    | Abs. Rel. | Sq. Rel. | RMSE   | RMSE (Log) | Inlier Ratio<br>( $\lambda = 1.25$ ) | Inlier Ratio<br>( $\lambda = 1.25^2$ ) | Inlier Ratio<br>( $\lambda = 1.25^3$ ) |
|---------------------------------|--------|-----------|----------|--------|------------|--------------------------------------|----------------------------------------|----------------------------------------|
| No Adaptation                   | 0.5029 | 0.2770    | 0.3114   | 0.7194 | 0.1768     | 0.5950                               | 0.8021                                 | 0.8799                                 |
| Schneider et al. [22]           | 0.3800 | 0.2071    | 0.1240   | 0.5075 | 0.0953     | 0.7070                               | 0.9723                                 | 0.9914                                 |
| Tent [24]                       | 0.4718 | 0.2585    | 0.2693   | 0.7245 | 0.1812     | 0.6205                               | 0.8183                                 | 0.8916                                 |
| Flip Consistency                | 0.3416 | 0.2064    | 0.1161   | 0.4584 | 0.1090     | 0.7121                               | 0.9401                                 | 0.9753                                 |
| Mask Consistency                | 0.3818 | 0.2004    | 0.1404   | 0.5899 | 0.1245     | 0.7092                               | 0.9015                                 | 0.9578                                 |
| Photometric Consistency         | 0.4544 | 0.2597    | 0.2660   | 0.6843 | 0.1672     | 0.6366                               | 0.8445                                 | 0.9097                                 |
| Pseudo Labelling                | 0.3274 | 0.1854    | 0.1078   | 0.4754 | 0.1070     | 0.7623                               | 0.9339                                 | 0.9721                                 |
| Vanilla T <sup>2</sup> Net [25] | 0.3324 | 0.2043    | 0.1369   | 0.4648 | 0.1126     | 0.7495                               | 0.9298                                 | 0.9681                                 |
| CrDoCo [8]                      | 0.3383 | 0.1929    | 0.1102   | 0.4906 | 0.1051     | 0.7404                               | 0.9408                                 | 0.9781                                 |
| Feature Consistency             | 0.4046 | 0.2115    | 0.1539   | 0.6142 | 0.1302     | 0.6660                               | 0.8876                                 | 0.9531                                 |
| Ground-Truth Training           | 0.1868 | 0.1096    | 0.0550   | 0.2947 | 0.0720     | 0.8907                               | 0.9674                                 | 0.9860                                 |
| Ours                            | 0.2557 | 0.1349    | 0.0717   | 0.4037 | 0.0851     | 0.8445                               | 0.9597                                 | 0.9837                                 |

Table B.13: Online adaptation in gaussian noise evaluated in the OmniScenes [13] dataset.

| Method                          | MAE    | Abs. Rel. | Sq. Rel. | RMSE   | RMSE (Log) | Inlier Ratio<br>( $\lambda = 1.25$ ) | Inlier Ratio<br>( $\lambda = 1.25^2$ ) | Inlier Ratio<br>( $\lambda = 1.25^3$ ) |
|---------------------------------|--------|-----------|----------|--------|------------|--------------------------------------|----------------------------------------|----------------------------------------|
| No Adaptation                   | 0.7473 | 0.4189    | 0.4784   | 0.9412 | 0.1649     | 0.3244                               | 0.7849                                 | 0.9368                                 |
| Schneider et al. [22]           | 0.3805 | 0.2064    | 0.1217   | 0.5048 | 0.0948     | 0.7144                               | 0.9723                                 | 0.9923                                 |
| Tent [24]                       | 0.6900 | 0.3872    | 0.4067   | 0.8798 | 0.1576     | 0.3752                               | 0.8195                                 | 0.9481                                 |
| Flip Consistency                | 0.4892 | 0.3025    | 0.2027   | 0.5750 | 0.1281     | 0.4454                               | 0.9114                                 | 0.9793                                 |
| Mask Consistency                | 0.4715 | 0.2995    | 0.1914   | 0.5531 | 0.1281     | 0.4464                               | 0.9129                                 | 0.9799                                 |
| Photometric Consistency         | 0.7913 | 0.4655    | 0.4944   | 0.9309 | 0.1776     | 0.1959                               | 0.7345                                 | 0.9340                                 |
| Pseudo Labelling                | 0.4980 | 0.3064    | 0.2038   | 0.5793 | 0.1286     | 0.4273                               | 0.9164                                 | 0.9803                                 |
| Vanilla T <sup>2</sup> Net [25] | 0.5771 | 0.3668    | 0.3141   | 0.6923 | 0.1511     | 0.4214                               | 0.8409                                 | 0.9531                                 |
| CrDoCo [8]                      | 0.4024 | 0.2534    | 0.1463   | 0.4898 | 0.1130     | 0.5797                               | 0.9392                                 | 0.9852                                 |
| Feature Consistency             | 0.4755 | 0.2377    | 0.1979   | 0.7094 | 0.1417     | 0.5922                               | 0.8486                                 | 0.9376                                 |
| Ground-Truth Training           | 0.2030 | 0.1171    | 0.0575   | 0.3034 | 0.0677     | 0.8789                               | 0.9764                                 | 0.9925                                 |
| Ours                            | 0.3311 | 0.1876    | 0.1080   | 0.4455 | 0.0930     | 0.7160                               | 0.9620                                 | 0.9905                                 |

Table B.14: Online adaptation in salt and pepper noise evaluated in the OmniScenes [13] dataset.

| Method                          | MAE    | Abs. Rel. | Sq. Rel. | RMSE   | RMSE (Log) | Inlier Ratio<br>( $\lambda = 1.25$ ) | Inlier Ratio<br>( $\lambda = 1.25^2$ ) | Inlier Ratio<br>( $\lambda = 1.25^3$ ) |
|---------------------------------|--------|-----------|----------|--------|------------|--------------------------------------|----------------------------------------|----------------------------------------|
| No Adaptation                   | 0.5285 | 0.2970    | 0.3467   | 0.7498 | 0.1787     | 0.5729                               | 0.8000                                 | 0.8826                                 |
| Schneider et al. [22]           | 0.3918 | 0.2119    | 0.1344   | 0.5313 | 0.0981     | 0.7048                               | 0.9646                                 | 0.9890                                 |
| Tent [24]                       | 0.4945 | 0.2753    | 0.2902   | 0.7334 | 0.1783     | 0.5988                               | 0.8170                                 | 0.8958                                 |
| Flip Consistency                | 0.3779 | 0.2323    | 0.1408   | 0.4878 | 0.1154     | 0.6493                               | 0.9347                                 | 0.9751                                 |
| Mask Consistency                | 0.3641 | 0.2137    | 0.1273   | 0.5021 | 0.1117     | 0.6906                               | 0.9327                                 | 0.9764                                 |
| Photometric Consistency         | 0.5642 | 0.3368    | 0.4919   | 0.8553 | 0.2010     | 0.5685                               | 0.7775                                 | 0.8630                                 |
| Pseudo Labelling                | 0.3761 | 0.2233    | 0.1510   | 0.5260 | 0.1182     | 0.6849                               | 0.9232                                 | 0.9695                                 |
| Vanilla T <sup>2</sup> Net [25] | 0.3691 | 0.2299    | 0.1603   | 0.4953 | 0.1169     | 0.6954                               | 0.9246                                 | 0.9698                                 |
| CrDoCo [8]                      | 0.3581 | 0.2093    | 0.1233   | 0.5006 | 0.1096     | 0.7097                               | 0.9355                                 | 0.9771                                 |
| Feature Consistency             | 0.4086 | 0.2218    | 0.1542   | 0.5971 | 0.1280     | 0.6413                               | 0.8958                                 | 0.9611                                 |
| Ground-Truth Training           | 0.2036 | 0.1194    | 0.0602   | 0.3150 | 0.0744     | 0.8745                               | 0.9683                                 | 0.9878                                 |
| Ours                            | 0.2753 | 0.1509    | 0.0830   | 0.4160 | 0.0881     | 0.8233                               | 0.9603                                 | 0.9850                                 |

Table B.15: Online adaptation in speckle noise evaluated in the OmniScenes [13] dataset.

| Method                          | MAE    | Abs. Rel. | Sq. Rel. | RMSE   | RMSE (Log) | Inlier Ratio<br>( $\lambda = 1.25$ ) | Inlier Ratio<br>( $\lambda = 1.25^2$ ) | Inlier Ratio<br>( $\lambda = 1.25^3$ ) |
|---------------------------------|--------|-----------|----------|--------|------------|--------------------------------------|----------------------------------------|----------------------------------------|
| No Adaptation                   | 0.4656 | 0.2533    | 0.2171   | 0.6551 | 0.1215     | 0.63                                 | 0.9077                                 | 0.9704                                 |
| Schneider et al. [22]           | 0.5102 | 0.2684    | 0.2686   | 0.7714 | 0.1308     | 0.5776                               | 0.8871                                 | 0.9632                                 |
| Tent [24]                       | 0.4645 | 0.2527    | 0.2163   | 0.6537 | 0.1213     | 0.6314                               | 0.908                                  | 0.9705                                 |
| Flip Consistency                | 0.4586 | 0.2494    | 0.2085   | 0.6441 | 0.1207     | 0.6344                               | 0.9091                                 | 0.9706                                 |
| Mask Consistency                | 0.444  | 0.2426    | 0.1967   | 0.6271 | 0.118      | 0.6522                               | 0.914                                  | 0.9722                                 |
| Photometric Consistency         | 0.4674 | 0.2559    | 0.2188   | 0.6538 | 0.1218     | 0.6254                               | 0.9071                                 | 0.9706                                 |
| Pseudo Labelling                | 0.4476 | 0.2471    | 0.2006   | 0.6214 | 0.1179     | 0.6411                               | 0.9133                                 | 0.9732                                 |
| Vanilla T <sup>2</sup> Net [25] | 0.4404 | 0.2402    | 0.1944   | 0.6268 | 0.1183     | 0.6565                               | 0.9136                                 | 0.9716                                 |
| CrDoCo [8]                      | 0.444  | 0.2437    | 0.1971   | 0.6257 | 0.1181     | 0.6497                               | 0.9134                                 | 0.9722                                 |
| Feature Consistency             | 0.4374 | 0.2365    | 0.19     | 0.6223 | 0.1172     | 0.6611                               | 0.9155                                 | 0.9722                                 |
| Ground-Truth Training           | 0.4023 | 0.2234    | 0.1678   | 0.5646 | 0.1108     | 0.6903                               | 0.9252                                 | 0.9762                                 |
| Ours                            | 0.4313 | 0.2365    | 0.1896   | 0.6057 | 0.1152     | 0.6652                               | 0.9185                                 | 0.9744                                 |

Table B.16: Offline adaptation using 5% of the panorama images for training in the Stanford 2D-3D-S [4] dataset.

| Method                          | MAE    | Abs. Rel. | Sq. Rel. | RMSE   | RMSE (Log) | Inlier Ratio<br>( $\lambda = 1.25$ ) | Inlier Ratio<br>( $\lambda = 1.25^2$ ) | Inlier Ratio<br>( $\lambda = 1.25^3$ ) |
|---------------------------------|--------|-----------|----------|--------|------------|--------------------------------------|----------------------------------------|----------------------------------------|
| No Adaptation                   | 0.4601 | 0.2491    | 0.2136   | 0.6560 | 0.1217     | 0.6387                               | 0.9091                                 | 0.9698                                 |
| Schneider et al. [22]           | 0.4973 | 0.2618    | 0.2557   | 0.7548 | 0.1276     | 0.5865                               | 0.8957                                 | 0.9662                                 |
| Tent [24]                       | 0.4592 | 0.2486    | 0.2129   | 0.6549 | 0.1215     | 0.6398                               | 0.9094                                 | 0.9699                                 |
| Flip Consistency                | 0.4513 | 0.2461    | 0.2051   | 0.6383 | 0.1202     | 0.6435                               | 0.9115                                 | 0.9706                                 |
| Mask Consistency                | 0.4461 | 0.2411    | 0.2004   | 0.6419 | 0.1197     | 0.6554                               | 0.9124                                 | 0.9702                                 |
| Photometric Consistency         | 0.4623 | 0.2510    | 0.2152   | 0.6573 | 0.1220     | 0.6352                               | 0.9085                                 | 0.9698                                 |
| Pseudo Labelling                | 0.4505 | 0.2448    | 0.2038   | 0.6431 | 0.1206     | 0.6452                               | 0.9108                                 | 0.9701                                 |
| Vanilla T <sup>2</sup> Net [25] | 0.4430 | 0.2385    | 0.1983   | 0.6419 | 0.1198     | 0.6610                               | 0.9120                                 | 0.9694                                 |
| CrDoCo [8]                      | 0.4444 | 0.2419    | 0.1991   | 0.6362 | 0.1191     | 0.6537                               | 0.9131                                 | 0.9711                                 |
| Feature Consistency             | 0.4415 | 0.2378    | 0.1971   | 0.6385 | 0.1196     | 0.6618                               | 0.9116                                 | 0.9693                                 |
| Ground-Truth Training           | 0.4073 | 0.2255    | 0.1741   | 0.5789 | 0.1126     | 0.6881                               | 0.9236                                 | 0.9749                                 |
| Ours                            | 0.4313 | 0.2350    | 0.1914   | 0.6134 | 0.1168     | 0.6686                               | 0.9164                                 | 0.9722                                 |

Table B.17: Offline adaptation using 10% of the panorama images for training in the Stanford 2D-3D-S [4] dataset.

| Method                          | MAE    | Abs. Rel. | Sq. Rel. | RMSE   | RMSE (Log) | Inlier Ratio<br>( $\lambda = 1.25$ ) | Inlier Ratio<br>( $\lambda = 1.25^2$ ) | Inlier Ratio<br>( $\lambda = 1.25^3$ ) |
|---------------------------------|--------|-----------|----------|--------|------------|--------------------------------------|----------------------------------------|----------------------------------------|
| No Adaptation                   | 0.4538 | 0.2461    | 0.2069   | 0.6504 | 0.1208     | 0.6444                               | 0.9113                                 | 0.9708                                 |
| Schneider et al. [22]           | 0.4381 | 0.2351    | 0.1957   | 0.6793 | 0.1156     | 0.6446                               | 0.9266                                 | 0.9780                                 |
| Tent [24]                       | 0.4397 | 0.2361    | 0.1949   | 0.6680 | 0.1209     | 0.6683                               | 0.9159                                 | 0.9718                                 |
| Flip Consistency                | 0.3951 | 0.2253    | 0.1538   | 0.6183 | 0.1145     | 0.6785                               | 0.9221                                 | 0.9750                                 |
| Mask Consistency                | 0.4120 | 0.2333    | 0.1638   | 0.6594 | 0.1186     | 0.6552                               | 0.9152                                 | 0.9709                                 |
| Photometric Consistency         | 0.4752 | 0.2792    | 0.2150   | 0.6596 | 0.1277     | 0.5670                               | 0.9030                                 | 0.9718                                 |
| Pseudo Labelling                | 0.4038 | 0.2304    | 0.1608   | 0.6329 | 0.1165     | 0.6684                               | 0.9186                                 | 0.9729                                 |
| Vanilla T <sup>2</sup> Net [25] | 0.4017 | 0.2336    | 0.1683   | 0.6236 | 0.1166     | 0.6762                               | 0.9156                                 | 0.9726                                 |
| CrDoCo [8]                      | 0.4091 | 0.2313    | 0.1644   | 0.6626 | 0.1175     | 0.6654                               | 0.9137                                 | 0.9714                                 |
| Feature Consistency             | 0.6116 | 0.2687    | 0.3168   | 1.0522 | 0.1906     | 0.5360                               | 0.7803                                 | 0.8794                                 |
| Ground-Truth Training           | 0.2624 | 0.1415    | 0.0921   | 0.4524 | 0.0866     | 0.8366                               | 0.9585                                 | 0.9860                                 |
| Ours                            | 0.2994 | 0.1594    | 0.1136   | 0.5008 | 0.0944     | 0.8086                               | 0.9511                                 | 0.9824                                 |

Table B.18: Online adaptation in dataset shift evaluated in the Stanford 2D-3D-S [4] dataset.

| Method                          | MAE    | Abs. Rel. | Sq. Rel. | RMSE   | RMSE (Log) | Inlier Ratio<br>( $\lambda = 1.25$ ) | Inlier Ratio<br>( $\lambda = 1.25^2$ ) | Inlier Ratio<br>( $\lambda = 1.25^3$ ) |
|---------------------------------|--------|-----------|----------|--------|------------|--------------------------------------|----------------------------------------|----------------------------------------|
| No Adaptation                   | 0.4018 | 0.2295    | 0.1645   | 0.5567 | 0.1157     | 0.6505                               | 0.9194                                 | 0.9743                                 |
| Schneider et al. [22]           | 0.4826 | 0.2759    | 0.2379   | 0.6949 | 0.1263     | 0.5577                               | 0.9031                                 | 0.9725                                 |
| Tent [24]                       | 0.3910 | 0.2225    | 0.1565   | 0.5652 | 0.1157     | 0.6682                               | 0.9220                                 | 0.9749                                 |
| Flip Consistency                | 0.3391 | 0.2086    | 0.1213   | 0.4775 | 0.1091     | 0.7039                               | 0.9281                                 | 0.9774                                 |
| Mask Consistency                | 0.3427 | 0.2140    | 0.1234   | 0.4817 | 0.1100     | 0.6942                               | 0.9258                                 | 0.9769                                 |
| Photometric Consistency         | 0.3874 | 0.2238    | 0.1527   | 0.5597 | 0.1188     | 0.6626                               | 0.9179                                 | 0.9720                                 |
| Pseudo Labelling                | 0.3671 | 0.2306    | 0.1411   | 0.5012 | 0.1136     | 0.6662                               | 0.9213                                 | 0.9765                                 |
| Vanilla T <sup>2</sup> Net [25] | 0.3670 | 0.2360    | 0.1464   | 0.4988 | 0.1158     | 0.6636                               | 0.9150                                 | 0.9735                                 |
| CrDoCo [8]                      | 0.3475 | 0.2109    | 0.1240   | 0.5055 | 0.1116     | 0.6933                               | 0.9216                                 | 0.9751                                 |
| Feature Consistency             | 0.4633 | 0.2501    | 0.2024   | 0.7093 | 0.1484     | 0.5870                               | 0.8515                                 | 0.9350                                 |
| Ground-Truth Training           | 0.2728 | 0.1594    | 0.0853   | 0.4119 | 0.0932     | 0.7954                               | 0.9498                                 | 0.9851                                 |
| Ours                            | 0.2995 | 0.1712    | 0.1001   | 0.4517 | 0.0987     | 0.7696                               | 0.9440                                 | 0.9815                                 |

Table B.19: Online adaptation in low lighting evaluated in the Stanford 2D-3D-S [4] dataset..

| Method                          | MAE    | Abs. Rel. | Sq. Rel. | RMSE   | RMSE (Log) | Inlier Ratio<br>( $\lambda = 1.25$ ) | Inlier Ratio<br>( $\lambda = 1.25^2$ ) | Inlier Ratio<br>( $\lambda = 1.25^3$ ) |
|---------------------------------|--------|-----------|----------|--------|------------|--------------------------------------|----------------------------------------|----------------------------------------|
| No Adaptation                   | 0.4484 | 0.2503    | 0.1943   | 0.6187 | 0.1289     | 0.6043                               | 0.8947                                 | 0.9617                                 |
| Schneider et al. [22]           | 0.4819 | 0.2749    | 0.2358   | 0.6904 | 0.1259     | 0.5581                               | 0.9036                                 | 0.9731                                 |
| Tent [24]                       | 0.4364 | 0.2426    | 0.1856   | 0.6328 | 0.1305     | 0.6231                               | 0.8982                                 | 0.9622                                 |
| Flip Consistency                | 0.3763 | 0.2190    | 0.1448   | 0.5630 | 0.1237     | 0.6775                               | 0.9015                                 | 0.9626                                 |
| Mask Consistency                | 0.3567 | 0.2250    | 0.1324   | 0.4933 | 0.1130     | 0.6819                               | 0.9193                                 | 0.9755                                 |
| Photometric Consistency         | 0.4583 | 0.2692    | 0.2000   | 0.6268 | 0.1314     | 0.5745                               | 0.8938                                 | 0.9657                                 |
| Pseudo Labelling                | 0.4116 | 0.2579    | 0.1670   | 0.5454 | 0.1225     | 0.6046                               | 0.9069                                 | 0.9725                                 |
| Vanilla T <sup>2</sup> Net [25] | 0.3934 | 0.2481    | 0.1597   | 0.5294 | 0.1200     | 0.6352                               | 0.9087                                 | 0.9729                                 |
| CrDoCo [8]                      | 0.3506 | 0.2190    | 0.1276   | 0.4926 | 0.1119     | 0.6902                               | 0.9202                                 | 0.9761                                 |
| Feature Consistency             | 0.5548 | 0.2730    | 0.2651   | 0.8570 | 0.1847     | 0.5144                               | 0.7729                                 | 0.8830                                 |
| Ground-Truth Training           | 0.2680 | 0.1574    | 0.0842   | 0.4079 | 0.0921     | 0.8039                               | 0.9501                                 | 0.9849                                 |
| Ours                            | 0.3208 | 0.1779    | 0.1121   | 0.4968 | 0.1084     | 0.7516                               | 0.9292                                 | 0.9736                                 |

Table B.20: Online adaptation in white balance change evaluated in the Stanford 2D-3D-S [4] dataset.

| Method                          | MAE    | Abs. Rel. | Sq. Rel. | RMSE   | RMSE (Log) | Inlier Ratio<br>( $\lambda = 1.25$ ) | Inlier Ratio<br>( $\lambda = 1.25^2$ ) | Inlier Ratio<br>( $\lambda = 1.25^3$ ) |
|---------------------------------|--------|-----------|----------|--------|------------|--------------------------------------|----------------------------------------|----------------------------------------|
| No Adaptation                   | 0.4480 | 0.2630    | 0.2045   | 0.6001 | 0.1214     | 0.6096                               | 0.9060                                 | 0.9729                                 |
| Schneider et al. [22]           | 0.4787 | 0.2730    | 0.2278   | 0.6811 | 0.1247     | 0.5567                               | 0.9056                                 | 0.9743                                 |
| Tent [24]                       | 0.4306 | 0.2524    | 0.1906   | 0.5968 | 0.1201     | 0.6343                               | 0.9117                                 | 0.9745                                 |
| Flip Consistency                | 0.3722 | 0.2373    | 0.1459   | 0.4994 | 0.1144     | 0.6608                               | 0.9186                                 | 0.9767                                 |
| Mask Consistency                | 0.3439 | 0.2207    | 0.1275   | 0.4743 | 0.1098     | 0.6949                               | 0.9245                                 | 0.9777                                 |
| Photometric Consistency         | 0.5021 | 0.3105    | 0.2447   | 0.6446 | 0.1357     | 0.5093                               | 0.8789                                 | 0.9662                                 |
| Pseudo Labelling                | 0.3923 | 0.2499    | 0.1577   | 0.5182 | 0.1178     | 0.6302                               | 0.9145                                 | 0.9757                                 |
| Vanilla T <sup>2</sup> Net [25] | 0.3835 | 0.2490    | 0.1601   | 0.5140 | 0.1187     | 0.6445                               | 0.9090                                 | 0.9732                                 |
| CrDoCo [8]                      | 0.3575 | 0.2325    | 0.1391   | 0.4880 | 0.1137     | 0.6727                               | 0.9164                                 | 0.9759                                 |
| Feature Consistency             | 0.4370 | 0.2273    | 0.1832   | 0.6742 | 0.1415     | 0.6208                               | 0.8598                                 | 0.9396                                 |
| Ground-Truth Training           | 0.2600 | 0.1526    | 0.0836   | 0.4019 | 0.0900     | 0.8167                               | 0.9527                                 | 0.9854                                 |
| Ours                            | 0.2887 | 0.1678    | 0.0993   | 0.4387 | 0.0956     | 0.7895                               | 0.9468                                 | 0.9826                                 |

Table B.21: Online adaptation in image gamma change evaluated in the Stanford 2D-3D-S [4] dataset.

| Method                          | MAE    | Abs. Rel. | Sq. Rel. | RMSE   | RMSE (Log) | Inlier Ratio<br>( $\lambda = 1.25$ ) | Inlier Ratio<br>( $\lambda = 1.25^2$ ) | Inlier Ratio<br>( $\lambda = 1.25^3$ ) |
|---------------------------------|--------|-----------|----------|--------|------------|--------------------------------------|----------------------------------------|----------------------------------------|
| No Adaptation                   | 0.4477 | 0.2187    | 0.2015   | 0.6987 | 0.1164     | 0.7078                               | 0.9259                                 | 0.9698                                 |
| Schneider et al. [22]           | 0.3996 | 0.1865    | 0.1607   | 0.6796 | 0.1048     | 0.7645                               | 0.9473                                 | 0.9806                                 |
| Tent [24]                       | 0.4541 | 0.2178    | 0.2011   | 0.7520 | 0.1204     | 0.7067                               | 0.9253                                 | 0.9696                                 |
| Flip Consistency                | 0.4345 | 0.2180    | 0.1738   | 0.7062 | 0.1110     | 0.7038                               | 0.9382                                 | 0.9784                                 |
| Mask Consistency                | 0.4330 | 0.2170    | 0.1749   | 0.7296 | 0.1110     | 0.7044                               | 0.9361                                 | 0.9776                                 |
| Photometric Consistency         | 0.4519 | 0.2170    | 0.1975   | 0.7504 | 0.1214     | 0.6990                               | 0.9260                                 | 0.9686                                 |
| Pseudo Labelling                | 0.4341 | 0.2070    | 0.1745   | 0.7638 | 0.1136     | 0.7193                               | 0.9303                                 | 0.9734                                 |
| Vanilla T <sup>2</sup> Net [25] | 0.4243 | 0.2060    | 0.1698   | 0.7484 | 0.1096     | 0.7282                               | 0.9350                                 | 0.9763                                 |
| CrDoCo [8]                      | 0.4212 | 0.2017    | 0.1665   | 0.7592 | 0.1082     | 0.7390                               | 0.9356                                 | 0.9767                                 |
| Feature Consistency             | 0.5788 | 0.2286    | 0.2871   | 1.1030 | 0.1693     | 0.6357                               | 0.8420                                 | 0.9113                                 |
| Ground-Truth Training           | 0.3121 | 0.1561    | 0.1243   | 0.5452 | 0.0894     | 0.8356                               | 0.9605                                 | 0.9852                                 |
| Ours                            | 0.3471 | 0.1727    | 0.1423   | 0.5803 | 0.0960     | 0.8036                               | 0.9546                                 | 0.9829                                 |

Table B.22: Online adaptation in large scenes evaluated in the Stanford 2D-3D-S [4] dataset.

| Method                          | MAE    | Abs. Rel. | Sq. Rel. | RMSE   | RMSE (Log) | Inlier Ratio<br>( $\lambda = 1.25$ ) | Inlier Ratio<br>( $\lambda = 1.25^2$ ) | Inlier Ratio<br>( $\lambda = 1.25^3$ ) |
|---------------------------------|--------|-----------|----------|--------|------------|--------------------------------------|----------------------------------------|----------------------------------------|
| No Adaptation                   | 0.3692 | 0.2702    | 0.1673   | 0.4963 | 0.1289     | 0.5536                               | 0.8942                                 | 0.9700                                 |
| Schneider et al. [22]           | 0.7259 | 0.5169    | 0.5504   | 0.9410 | 0.1914     | 0.1590                               | 0.6832                                 | 0.9222                                 |
| Tent [24]                       | 0.3686 | 0.2684    | 0.1670   | 0.5025 | 0.1292     | 0.5605                               | 0.8937                                 | 0.9693                                 |
| Flip Consistency                | 0.3494 | 0.2575    | 0.1489   | 0.4742 | 0.1277     | 0.5780                               | 0.8986                                 | 0.9681                                 |
| Mask Consistency                | 0.3504 | 0.2614    | 0.1492   | 0.4681 | 0.1254     | 0.5726                               | 0.9052                                 | 0.9717                                 |
| Photometric Consistency         | 0.3900 | 0.2870    | 0.1836   | 0.5210 | 0.1318     | 0.5234                               | 0.8856                                 | 0.9683                                 |
| Pseudo Labelling                | 0.3788 | 0.2817    | 0.1737   | 0.5015 | 0.1298     | 0.5329                               | 0.8933                                 | 0.9700                                 |
| Vanilla T <sup>2</sup> Net [25] | 0.3598 | 0.2692    | 0.1584   | 0.4775 | 0.1271     | 0.5572                               | 0.9006                                 | 0.9705                                 |
| CrDoCo [8]                      | 0.3441 | 0.2565    | 0.1442   | 0.4637 | 0.1269     | 0.5813                               | 0.8997                                 | 0.9684                                 |
| Feature Consistency             | 0.3518 | 0.2558    | 0.1492   | 0.4838 | 0.1312     | 0.5715                               | 0.8899                                 | 0.9635                                 |
| Ground-Truth Training           | 0.3224 | 0.2387    | 0.1324   | 0.4428 | 0.1204     | 0.6365                               | 0.9131                                 | 0.9731                                 |
| Ours                            | 0.3380 | 0.2485    | 0.1400   | 0.4612 | 0.1240     | 0.6030                               | 0.9069                                 | 0.9717                                 |

Table B.23: Online adaptation in small scenes evaluated in the Stanford 2D-3D-S [4] dataset.

| Method                          | MAE    | Abs. Rel. | Sq. Rel. | RMSE   | RMSE (Log) | Inlier Ratio<br>( $\lambda = 1.25$ ) | Inlier Ratio<br>( $\lambda = 1.25^2$ ) | Inlier Ratio<br>( $\lambda = 1.25^3$ ) |
|---------------------------------|--------|-----------|----------|--------|------------|--------------------------------------|----------------------------------------|----------------------------------------|
| No Adaptation                   | 0.6338 | 0.4173    | 0.5105   | 0.8961 | 0.1883     | 0.4565                               | 0.7385                                 | 0.8736                                 |
| Schneider et al. [22]           | 0.6689 | 0.4128    | 0.5905   | 1.0118 | 0.1957     | 0.4283                               | 0.7307                                 | 0.8763                                 |
| Tent [24]                       | 0.6140 | 0.4044    | 0.4817   | 0.8734 | 0.1863     | 0.4710                               | 0.7482                                 | 0.8805                                 |
| Flip Consistency                | 0.5165 | 0.3283    | 0.2912   | 0.7463 | 0.1654     | 0.5099                               | 0.7931                                 | 0.9093                                 |
| Mask Consistency                | 0.5241 | 0.3456    | 0.3090   | 0.7420 | 0.1666     | 0.5014                               | 0.7883                                 | 0.9060                                 |
| Photometric Consistency         | 0.7020 | 0.4857    | 0.6141   | 0.9436 | 0.2006     | 0.4037                               | 0.6973                                 | 0.8547                                 |
| Pseudo Labelling                | 0.5337 | 0.3482    | 0.3172   | 0.7543 | 0.1689     | 0.4933                               | 0.7826                                 | 0.9045                                 |
| Vanilla T <sup>2</sup> Net [25] | 0.5671 | 0.4031    | 0.4120   | 0.7711 | 0.1782     | 0.4838                               | 0.7641                                 | 0.8876                                 |
| CrDoCo [8]                      | 0.4875 | 0.3064    | 0.2586   | 0.7175 | 0.1576     | 0.5402                               | 0.8119                                 | 0.9189                                 |
| Feature Consistency             | 0.6049 | 0.3223    | 0.3282   | 0.9144 | 0.2048     | 0.4404                               | 0.7076                                 | 0.8517                                 |
| Ground-Truth Training           | 0.4140 | 0.2637    | 0.2149   | 0.6145 | 0.1382     | 0.6188                               | 0.8560                                 | 0.9437                                 |
| Ours                            | 0.4910 | 0.2778    | 0.2513   | 0.7496 | 0.1659     | 0.5379                               | 0.7986                                 | 0.9162                                 |

Table B.24: Online adaptation in camera rotations evaluated in the Stanford 2D-3D-S [4] dataset.

| Method                          | MAE    | Abs. Rel. | Sq. Rel. | RMSE   | RMSE (Log) | Inlier Ratio<br>( $\lambda = 1.25$ ) | Inlier Ratio<br>( $\lambda = 1.25^2$ ) | Inlier Ratio<br>( $\lambda = 1.25^3$ ) |
|---------------------------------|--------|-----------|----------|--------|------------|--------------------------------------|----------------------------------------|----------------------------------------|
| No Adaptation                   | 0.5816 | 0.2848    | 0.3196   | 0.8809 | 0.2088     | 0.5158                               | 0.7474                                 | 0.8531                                 |
| Schneider et al. [22]           | 0.5049 | 0.2948    | 0.2788   | 0.7356 | 0.1354     | 0.5389                               | 0.8807                                 | 0.9617                                 |
| Tent [24]                       | 0.5788 | 0.2808    | 0.3131   | 0.9297 | 0.2143     | 0.5220                               | 0.7478                                 | 0.8540                                 |
| Flip Consistency                | 0.5882 | 0.2802    | 0.3002   | 0.9428 | 0.2032     | 0.5052                               | 0.7474                                 | 0.8617                                 |
| Mask Consistency                | 0.7381 | 0.3376    | 0.4076   | 1.1113 | 0.2568     | 0.3664                               | 0.6149                                 | 0.7674                                 |
| Photometric Consistency         | 0.4515 | 0.2441    | 0.2110   | 0.7100 | 0.1573     | 0.6191                               | 0.8474                                 | 0.9269                                 |
| Pseudo Labelling                | 0.5162 | 0.2587    | 0.2430   | 0.8323 | 0.1755     | 0.5605                               | 0.8016                                 | 0.9005                                 |
| Vanilla T <sup>2</sup> Net [25] | 0.4390 | 0.2497    | 0.2102   | 0.6776 | 0.1487     | 0.6234                               | 0.8554                                 | 0.9349                                 |
| CrDoCo [8]                      | 0.6525 | 0.3030    | 0.3396   | 1.0192 | 0.2214     | 0.4432                               | 0.6924                                 | 0.8277                                 |
| Feature Consistency             | 0.4787 | 0.2518    | 0.2171   | 0.7482 | 0.1605     | 0.5882                               | 0.8276                                 | 0.9187                                 |
| Ground-Truth Training           | 0.3183 | 0.1869    | 0.1206   | 0.4952 | 0.1109     | 0.7418                               | 0.9176                                 | 0.9701                                 |
| Ours                            | 0.4091 | 0.2044    | 0.1651   | 0.6682 | 0.1417     | 0.6495                               | 0.8719                                 | 0.9427                                 |

Table B.25: Online adaptation in gaussian noise evaluated in the Stanford 2D-3D-S [4] dataset.

| Method                          | MAE    | Abs. Rel. | Sq. Rel. | RMSE   | RMSE (Log) | Inlier Ratio<br>( $\lambda = 1.25$ ) | Inlier Ratio<br>( $\lambda = 1.25^2$ ) | Inlier Ratio<br>( $\lambda = 1.25^3$ ) |
|---------------------------------|--------|-----------|----------|--------|------------|--------------------------------------|----------------------------------------|----------------------------------------|
| No Adaptation                   | 0.8215 | 0.4977    | 0.7425   | 1.1088 | 0.1973     | 0.3717                               | 0.6989                                 | 0.8608                                 |
| Schneider et al. [22]           | 0.5000 | 0.2864    | 0.2689   | 0.7428 | 0.1341     | 0.5560                               | 0.8826                                 | 0.9641                                 |
| Tent [24]                       | 0.7739 | 0.4674    | 0.6664   | 1.0653 | 0.1916     | 0.3970                               | 0.7241                                 | 0.8759                                 |
| Flip Consistency                | 0.4477 | 0.2872    | 0.2146   | 0.6100 | 0.1353     | 0.5787                               | 0.8684                                 | 0.9546                                 |
| Mask Consistency                | 0.4869 | 0.3141    | 0.2554   | 0.6591 | 0.1445     | 0.5340                               | 0.8458                                 | 0.9437                                 |
| Photometric Consistency         | 0.9862 | 0.6152    | 1.0352   | 1.2827 | 0.2288     | 0.2971                               | 0.6131                                 | 0.7955                                 |
| Pseudo Labelling                | 0.4995 | 0.3226    | 0.2622   | 0.6586 | 0.1451     | 0.5136                               | 0.8429                                 | 0.9453                                 |
| Vanilla T <sup>2</sup> Net [25] | 0.6522 | 0.4365    | 0.4794   | 0.8433 | 0.1797     | 0.4222                               | 0.7406                                 | 0.8938                                 |
| CrDoCo [8]                      | 0.4263 | 0.2697    | 0.1957   | 0.6018 | 0.1323     | 0.6111                               | 0.8732                                 | 0.9557                                 |
| Feature Consistency             | 0.5416 | 0.2721    | 0.2674   | 0.8473 | 0.1814     | 0.5372                               | 0.7844                                 | 0.8905                                 |
| Ground-Truth Training           | 0.3294 | 0.1957    | 0.1308   | 0.4940 | 0.1077     | 0.7434                               | 0.9217                                 | 0.9741                                 |
| Ours                            | 0.3843 | 0.2290    | 0.1690   | 0.5610 | 0.1189     | 0.6806                               | 0.9031                                 | 0.9670                                 |

Table B.26: Online adaptation in salt and pepper noise evaluated in the Stanford 2D-3D-S [4] dataset.

| Method                          | MAE    | Abs. Rel. | Sq. Rel. | RMSE   | RMSE (Log) | Inlier Ratio<br>( $\lambda = 1.25$ ) | Inlier Ratio<br>( $\lambda = 1.25^2$ ) | Inlier Ratio<br>( $\lambda = 1.25^3$ ) |
|---------------------------------|--------|-----------|----------|--------|------------|--------------------------------------|----------------------------------------|----------------------------------------|
| No Adaptation                   | 0.5291 | 0.2777    | 0.2937   | 0.7796 | 0.1783     | 0.5324                               | 0.7877                                 | 0.8992                                 |
| Schneider et al. [22]           | 0.5032 | 0.2953    | 0.2651   | 0.7229 | 0.1342     | 0.5266                               | 0.8850                                 | 0.9642                                 |
| Tent [24]                       | 0.5250 | 0.2719    | 0.2807   | 0.8240 | 0.1824     | 0.5404                               | 0.7918                                 | 0.9003                                 |
| Flip Consistency                | 0.6716 | 0.3124    | 0.3487   | 1.0187 | 0.2264     | 0.3972                               | 0.6693                                 | 0.8278                                 |
| Mask Consistency                | 0.5444 | 0.2713    | 0.2576   | 0.8487 | 0.1760     | 0.5043                               | 0.7904                                 | 0.9045                                 |
| Photometric Consistency         | 0.4359 | 0.2632    | 0.2325   | 0.6427 | 0.1417     | 0.6097                               | 0.8771                                 | 0.9494                                 |
| Pseudo Labelling                | 0.4622 | 0.2503    | 0.2096   | 0.7200 | 0.1507     | 0.5853                               | 0.8496                                 | 0.9368                                 |
| Vanilla T <sup>2</sup> Net [25] | 0.4258 | 0.2532    | 0.2073   | 0.6372 | 0.1400     | 0.6183                               | 0.8751                                 | 0.9496                                 |
| CrDoCo [8]                      | 0.5459 | 0.2699    | 0.2550   | 0.8597 | 0.1752     | 0.5037                               | 0.7910                                 | 0.9050                                 |
| Feature Consistency             | 0.4766 | 0.2497    | 0.2181   | 0.7474 | 0.1582     | 0.5828                               | 0.8321                                 | 0.9230                                 |
| Ground-Truth Training           | 0.3062 | 0.1829    | 0.1178   | 0.4704 | 0.1052     | 0.7588                               | 0.9307                                 | 0.9756                                 |
| Ours                            | 0.3375 | 0.1886    | 0.1266   | 0.5322 | 0.1125     | 0.7215                               | 0.9218                                 | 0.9716                                 |

Table B.27: Online adaptation in speckle noise evaluated in the Stanford 2D-3D-S [4] dataset.

| Method                          | MAE    | Abs. Rel. | Sq. Rel. | RMSE   | RMSE (Log) | Inlier Ratio<br>( $\lambda = 1.25$ ) | Inlier Ratio<br>( $\lambda = 1.25^2$ ) | Inlier Ratio<br>( $\lambda = 1.25^3$ ) |
|---------------------------------|--------|-----------|----------|--------|------------|--------------------------------------|----------------------------------------|----------------------------------------|
| No Adaptation                   | 0.4460 | 0.2163    | 0.1705   | 0.6222 | 0.1053     | 0.6960                               | 0.9412                                 | 0.9801                                 |
| Schneider et al. [22]           | 0.5226 | 0.2296    | 0.2340   | 0.7984 | 0.1254     | 0.6334                               | 0.9006                                 | 0.9599                                 |
| Tent [24]                       | 0.4418 | 0.2143    | 0.1684   | 0.6173 | 0.1046     | 0.7028                               | 0.9416                                 | 0.9803                                 |
| Flip Consistency                | 0.4349 | 0.2104    | 0.1625   | 0.6132 | 0.1028     | 0.7035                               | 0.9417                                 | 0.9804                                 |
| Mask Consistency                | 0.4153 | 0.2005    | 0.1513   | 0.5910 | 0.0996     | 0.7361                               | 0.9437                                 | 0.9811                                 |
| Photometric Consistency         | 0.4467 | 0.2187    | 0.1703   | 0.6222 | 0.1055     | 0.6861                               | 0.9425                                 | 0.9807                                 |
| Pseudo Labelling                | 0.4235 | 0.2068    | 0.1558   | 0.5923 | 0.1012     | 0.7157                               | 0.9445                                 | 0.9819                                 |
| Vanilla T <sup>2</sup> Net [25] | 0.4267 | 0.2018    | 0.1567   | 0.6208 | 0.1021     | 0.7320                               | 0.9390                                 | 0.9792                                 |
| CrDoCo [8]                      | 0.4229 | 0.2041    | 0.1531   | 0.5987 | 0.1012     | 0.7266                               | 0.9424                                 | 0.9810                                 |
| Feature Consistency             | 0.4237 | 0.1996    | 0.1533   | 0.6158 | 0.1013     | 0.7359                               | 0.9400                                 | 0.9795                                 |
| Ground-Truth Training           | 0.3490 | 0.1725    | 0.1196   | 0.5180 | 0.0895     | 0.7965                               | 0.9565                                 | 0.9854                                 |
| Ours                            | 0.3653 | 0.1798    | 0.1297   | 0.5253 | 0.0921     | 0.7910                               | 0.9512                                 | 0.9834                                 |

Table B.28: Full aggregated results for offline adaptation using 5% of the panorama images for training

| Method                          | MAE    | Abs. Rel. | Sq. Rel. | RMSE   | RMSE (Log) | Inlier Ratio<br>( $\lambda = 1.25$ ) | Inlier Ratio<br>( $\lambda = 1.25^2$ ) | Inlier Ratio<br>( $\lambda = 1.25^3$ ) |
|---------------------------------|--------|-----------|----------|--------|------------|--------------------------------------|----------------------------------------|----------------------------------------|
| No Adaptation                   | 0.4443 | 0.2157    | 0.1699   | 0.6232 | 0.1054     | 0.6973                               | 0.9422                                 | 0.9802                                 |
| Schneider et al. [22]           | 0.5186 | 0.2280    | 0.2302   | 0.7932 | 0.1241     | 0.6336                               | 0.9037                                 | 0.9614                                 |
| Tent [24]                       | 0.4399 | 0.2136    | 0.1676   | 0.6183 | 0.1046     | 0.7052                               | 0.9428                                 | 0.9803                                 |
| Flip Consistency                | 0.4223 | 0.2057    | 0.1564   | 0.5987 | 0.1013     | 0.7174                               | 0.9435                                 | 0.9809                                 |
| Mask Consistency                | 0.4190 | 0.2018    | 0.1539   | 0.5994 | 0.1009     | 0.7345                               | 0.9426                                 | 0.9804                                 |
| Photometric Consistency         | 0.4394 | 0.2149    | 0.1667   | 0.6123 | 0.1043     | 0.6978                               | 0.9440                                 | 0.9810                                 |
| Pseudo Labelling                | 0.4296 | 0.2076    | 0.1588   | 0.6107 | 0.1027     | 0.7149                               | 0.9431                                 | 0.9807                                 |
| Vanilla T <sup>2</sup> Net [25] | 0.4294 | 0.2027    | 0.1588   | 0.6290 | 0.1030     | 0.7307                               | 0.9377                                 | 0.9785                                 |
| CrDoCo [8]                      | 0.4239 | 0.2045    | 0.1548   | 0.6045 | 0.1018     | 0.7268                               | 0.9420                                 | 0.9806                                 |
| Feature Consistency             | 0.4277 | 0.2005    | 0.1578   | 0.6291 | 0.1028     | 0.7345                               | 0.9373                                 | 0.9781                                 |
| Ground-Truth Training           | 0.3398 | 0.1703    | 0.1167   | 0.5019 | 0.0882     | 0.8039                               | 0.9580                                 | 0.9857                                 |
| Ours                            | 0.3620 | 0.1784    | 0.1291   | 0.5231 | 0.0920     | 0.7951                               | 0.9511                                 | 0.9830                                 |

Table B.29: Full aggregated results for offline adaptation using 10% of the panorama images for training

| Method                          | MAE    | Abs. Rel. | Sq. Rel. | RMSE   | RMSE (Log) | Inlier Ratio<br>( $\lambda = 1.25$ ) | Inlier Ratio<br>( $\lambda = 1.25^2$ ) | Inlier Ratio<br>( $\lambda = 1.25^3$ ) |
|---------------------------------|--------|-----------|----------|--------|------------|--------------------------------------|----------------------------------------|----------------------------------------|
| No Adaptation                   | 0.4412 | 0.2143    | 0.1675   | 0.6211 | 0.1053     | 0.7012                               | 0.9424                                 | 0.9804                                 |
| Schneider et al. [22]           | 0.4178 | 0.1859    | 0.1593   | 0.7212 | 0.1077     | 0.7427                               | 0.9403                                 | 0.9789                                 |
| Tent [24]                       | 0.4274 | 0.2044    | 0.1582   | 0.6457 | 0.1052     | 0.7329                               | 0.9437                                 | 0.9805                                 |
| Flip Consistency                | 0.4414 | 0.2037    | 0.1594   | 0.7375 | 0.1092     | 0.7115                               | 0.9314                                 | 0.9745                                 |
| Mask Consistency                | 0.4601 | 0.2170    | 0.1679   | 0.7523 | 0.1130     | 0.6652                               | 0.9258                                 | 0.9723                                 |
| Photometric Consistency         | 0.4595 | 0.2354    | 0.1735   | 0.6633 | 0.1120     | 0.6254                               | 0.9355                                 | 0.9807                                 |
| Pseudo Labelling                | 0.4344 | 0.2143    | 0.1537   | 0.6812 | 0.1085     | 0.6824                               | 0.9358                                 | 0.9774                                 |
| Vanilla T <sup>2</sup> Net [25] | 0.4022 | 0.1984    | 0.1421   | 0.6303 | 0.1024     | 0.7471                               | 0.9408                                 | 0.9791                                 |
| CrDoCo [8]                      | 0.4646 | 0.2191    | 0.1727   | 0.7665 | 0.1139     | 0.6663                               | 0.9245                                 | 0.9708                                 |
| Feature Consistency             | 0.6412 | 0.2511    | 0.3080   | 1.1059 | 0.1683     | 0.5686                               | 0.8090                                 | 0.9028                                 |
| Ground-Truth Training           | 0.2388 | 0.1110    | 0.0736   | 0.4351 | 0.0713     | 0.8846                               | 0.9719                                 | 0.9903                                 |
| Ours                            | 0.3234 | 0.1494    | 0.1045   | 0.5246 | 0.0865     | 0.8300                               | 0.9607                                 | 0.9872                                 |

Table B.30: Full aggregated results for online adaptation in dataset shift

| Method                          | MAE    | Abs. Rel. | Sq. Rel. | RMSE   | RMSE (Log) | Inlier Ratio<br>( $\lambda = 1.25$ ) | Inlier Ratio<br>( $\lambda = 1.25^2$ ) | Inlier Ratio<br>( $\lambda = 1.25^3$ ) |
|---------------------------------|--------|-----------|----------|--------|------------|--------------------------------------|----------------------------------------|----------------------------------------|
| No Adaptation                   | 0.3862 | 0.2185    | 0.1480   | 0.5135 | 0.1039     | 0.6848                               | 0.9516                                 | 0.9836                                 |
| Schneider et al. [22]           | 0.4075 | 0.2255    | 0.1597   | 0.5643 | 0.1035     | 0.6778                               | 0.9505                                 | 0.9852                                 |
| Tent [24]                       | 0.3653 | 0.2072    | 0.1349   | 0.5011 | 0.1022     | 0.7276                               | 0.9542                                 | 0.9843                                 |
| Flip Consistency                | 0.3040 | 0.1864    | 0.0978   | 0.4087 | 0.0942     | 0.7753                               | 0.9591                                 | 0.9867                                 |
| Mask Consistency                | 0.3246 | 0.2053    | 0.1057   | 0.4231 | 0.1001     | 0.7121                               | 0.9537                                 | 0.9861                                 |
| Photometric Consistency         | 0.3634 | 0.2132    | 0.1325   | 0.4840 | 0.1054     | 0.6909                               | 0.9510                                 | 0.9828                                 |
| Pseudo Labelling                | 0.3564 | 0.2219    | 0.1235   | 0.4543 | 0.1041     | 0.6781                               | 0.9509                                 | 0.9855                                 |
| Vanilla T <sup>2</sup> Net [25] | 0.3433 | 0.2215    | 0.1213   | 0.4334 | 0.1045     | 0.6962                               | 0.9484                                 | 0.9844                                 |
| CrDoCo [8]                      | 0.3347 | 0.2081    | 0.1090   | 0.4445 | 0.1022     | 0.7055                               | 0.9504                                 | 0.9853                                 |
| Feature Consistency             | 0.4775 | 0.2459    | 0.2082   | 0.7111 | 0.1480     | 0.5827                               | 0.8413                                 | 0.9292                                 |
| Ground-Truth Training           | 0.1912 | 0.1125    | 0.0545   | 0.2984 | 0.0695     | 0.8855                               | 0.9724                                 | 0.9911                                 |
| Ours                            | 0.2362 | 0.1333    | 0.0690   | 0.3605 | 0.0779     | 0.8584                               | 0.9692                                 | 0.9894                                 |

Table B.31: Full aggregated results for online adaptation in low lighting

| Method                          | MAE    | Abs. Rel. | Sq. Rel. | RMSE   | RMSE (Log) | Inlier Ratio<br>( $\lambda = 1.25$ ) | Inlier Ratio<br>( $\lambda = 1.25^2$ ) | Inlier Ratio<br>( $\lambda = 1.25^3$ ) |
|---------------------------------|--------|-----------|----------|--------|------------|--------------------------------------|----------------------------------------|----------------------------------------|
| No Adaptation                   | 0.4141 | 0.2325    | 0.1615   | 0.5441 | 0.1110     | 0.6454                               | 0.9404                                 | 0.9781                                 |
| Schneider et al. [22]           | 0.4089 | 0.2256    | 0.1588   | 0.5636 | 0.1034     | 0.6742                               | 0.9511                                 | 0.9857                                 |
| Tent [24]                       | 0.3926 | 0.2207    | 0.1481   | 0.5342 | 0.1100     | 0.6901                               | 0.9433                                 | 0.9788                                 |
| Flip Consistency                | 0.3216 | 0.1904    | 0.1041   | 0.4472 | 0.1003     | 0.7608                               | 0.9481                                 | 0.9807                                 |
| Mask Consistency                | 0.3378 | 0.2118    | 0.1109   | 0.4395 | 0.1024     | 0.6995                               | 0.9504                                 | 0.9853                                 |
| Photometric Consistency         | 0.4190 | 0.2492    | 0.1597   | 0.5321 | 0.1153     | 0.5810                               | 0.9396                                 | 0.9804                                 |
| Pseudo Labelling                | 0.3673 | 0.2295    | 0.1281   | 0.4615 | 0.1069     | 0.6636                               | 0.9456                                 | 0.9840                                 |
| Vanilla T <sup>2</sup> Net [25] | 0.3592 | 0.2263    | 0.1262   | 0.4514 | 0.1057     | 0.6888                               | 0.9478                                 | 0.9844                                 |
| CrDoCo [8]                      | 0.3379 | 0.2125    | 0.1105   | 0.4394 | 0.1026     | 0.7026                               | 0.9504                                 | 0.9856                                 |
| Feature Consistency             | 0.4901 | 0.2495    | 0.2149   | 0.7294 | 0.1538     | 0.5703                               | 0.8295                                 | 0.9242                                 |
| Ground-Truth Training           | 0.1916 | 0.1126    | 0.0541   | 0.3003 | 0.0698     | 0.8855                               | 0.9720                                 | 0.9908                                 |
| Ours                            | 0.2527 | 0.1393    | 0.0749   | 0.3892 | 0.0834     | 0.8437                               | 0.9627                                 | 0.9860                                 |

Table B.32: Full aggregated results for online adaptation in white balance change

| Method                          | MAE    | Abs. Rel. | Sq. Rel. | RMSE   | RMSE (Log) | Inlier Ratio<br>( $\lambda = 1.25$ ) | Inlier Ratio<br>( $\lambda = 1.25^2$ ) | Inlier Ratio<br>( $\lambda = 1.25^3$ ) |
|---------------------------------|--------|-----------|----------|--------|------------|--------------------------------------|----------------------------------------|----------------------------------------|
| No Adaptation                   | 0.4048 | 0.2312    | 0.1565   | 0.5245 | 0.1048     | 0.6817                               | 0.9489                                 | 0.9841                                 |
| Schneider et al. [22]           | 0.4062 | 0.2242    | 0.1552   | 0.5587 | 0.1027     | 0.6768                               | 0.9522                                 | 0.9861                                 |
| Tent [24]                       | 0.3792 | 0.2173    | 0.1413   | 0.5046 | 0.1022     | 0.7266                               | 0.9524                                 | 0.9851                                 |
| Flip Consistency                | 0.3292 | 0.2072    | 0.1089   | 0.4191 | 0.0983     | 0.7360                               | 0.9560                                 | 0.9868                                 |
| Mask Consistency                | 0.3341 | 0.2121    | 0.1079   | 0.4271 | 0.1008     | 0.6975                               | 0.9549                                 | 0.9870                                 |
| Photometric Consistency         | 0.4192 | 0.2597    | 0.1717   | 0.5157 | 0.1144     | 0.5920                               | 0.9373                                 | 0.9816                                 |
| Pseudo Labelling                | 0.3506 | 0.2202    | 0.1187   | 0.4383 | 0.1018     | 0.7043                               | 0.9530                                 | 0.9863                                 |
| Vanilla T <sup>2</sup> Net [25] | 0.3338 | 0.2138    | 0.1157   | 0.4229 | 0.1007     | 0.7275                               | 0.9518                                 | 0.9852                                 |
| CrDoCo [8]                      | 0.3284 | 0.2096    | 0.1079   | 0.4246 | 0.1000     | 0.7255                               | 0.9527                                 | 0.9862                                 |
| Feature Consistency             | 0.3985 | 0.2103    | 0.1518   | 0.5914 | 0.1230     | 0.6646                               | 0.8945                                 | 0.9620                                 |
| Ground-Truth Training           | 0.1830 | 0.1076    | 0.0520   | 0.2904 | 0.0672     | 0.8962                               | 0.9742                                 | 0.9915                                 |
| Ours                            | 0.2332 | 0.1308    | 0.0672   | 0.3599 | 0.0766     | 0.8666                               | 0.9705                                 | 0.9898                                 |

Table B.33: Full aggregated results for online adaptation in image gamma change

| Method                          | MAE    | Abs. Rel. | Sq. Rel. | RMSE   | RMSE (Log) | Inlier Ratio<br>( $\lambda = 1.25$ ) | Inlier Ratio<br>( $\lambda = 1.25^2$ ) | Inlier Ratio<br>( $\lambda = 1.25^3$ ) |
|---------------------------------|--------|-----------|----------|--------|------------|--------------------------------------|----------------------------------------|----------------------------------------|
| No Adaptation                   | 0.4950 | 0.1892    | 0.1829   | 0.7659 | 0.1054     | 0.7289                               | 0.9341                                 | 0.9751                                 |
| Schneider et al. [22]           | 0.6117 | 0.2002    | 0.2547   | 1.0768 | 0.1429     | 0.6604                               | 0.8783                                 | 0.9495                                 |
| Tent [24]                       | 0.5021 | 0.1887    | 0.1845   | 0.8251 | 0.1093     | 0.7296                               | 0.9321                                 | 0.9745                                 |
| Flip Consistency                | 0.5491 | 0.1913    | 0.2019   | 0.9298 | 0.1123     | 0.7160                               | 0.9180                                 | 0.9677                                 |
| Mask Consistency                | 0.5451 | 0.1922    | 0.1971   | 0.9296 | 0.1100     | 0.7177                               | 0.9200                                 | 0.9710                                 |
| Photometric Consistency         | 0.5097 | 0.1936    | 0.1844   | 0.8308 | 0.1097     | 0.6993                               | 0.9344                                 | 0.9761                                 |
| Pseudo Labelling                | 0.5160 | 0.1876    | 0.1810   | 0.8770 | 0.1071     | 0.7269                               | 0.9279                                 | 0.9751                                 |
| Vanilla T <sup>2</sup> Net [25] | 0.5268 | 0.1843    | 0.1874   | 0.9118 | 0.1076     | 0.7399                               | 0.9241                                 | 0.9720                                 |
| CrDoCo [8]                      | 0.5554 | 0.1905    | 0.2032   | 0.9755 | 0.1111     | 0.7230                               | 0.9164                                 | 0.9680                                 |
| Feature Consistency             | 0.7215 | 0.2214    | 0.3261   | 1.2991 | 0.1578     | 0.6197                               | 0.8368                                 | 0.9197                                 |
| Ground-Truth Training           | 0.3437 | 0.1320    | 0.1135   | 0.6072 | 0.0804     | 0.8599                               | 0.9665                                 | 0.9879                                 |
| Ours                            | 0.4239 | 0.1591    | 0.1430   | 0.6977 | 0.0931     | 0.8032                               | 0.9525                                 | 0.9844                                 |

Table B.34: Full aggregated results for online adaptation in large scenes

| Method                          | MAE    | Abs. Rel. | Sq. Rel. | RMSE   | RMSE (Log) | Inlier Ratio<br>( $\lambda = 1.25$ ) | Inlier Ratio<br>( $\lambda = 1.25^2$ ) | Inlier Ratio<br>( $\lambda = 1.25^3$ ) |
|---------------------------------|--------|-----------|----------|--------|------------|--------------------------------------|----------------------------------------|----------------------------------------|
| No Adaptation                   | 0.3116 | 0.1770    | 0.0975   | 0.4292 | 0.0887     | 0.7878                               | 0.9573                                 | 0.9872                                 |
| Schneider et al. [22]           | 0.4010 | 0.2347    | 0.1911   | 0.5508 | 0.1021     | 0.6841                               | 0.9103                                 | 0.9768                                 |
| Tent [24]                       | 0.3071 | 0.1743    | 0.0953   | 0.4282 | 0.0889     | 0.7938                               | 0.9577                                 | 0.9873                                 |
| Flip Consistency                | 0.3049 | 0.1772    | 0.0899   | 0.4105 | 0.0890     | 0.7847                               | 0.9618                                 | 0.9879                                 |
| Mask Consistency                | 0.2724 | 0.1646    | 0.0781   | 0.3666 | 0.0835     | 0.8059                               | 0.9657                                 | 0.9894                                 |
| Photometric Consistency         | 0.2900 | 0.1700    | 0.0904   | 0.3995 | 0.0858     | 0.7962                               | 0.9584                                 | 0.9877                                 |
| Pseudo Labelling                | 0.3000 | 0.1764    | 0.0906   | 0.4033 | 0.0864     | 0.7907                               | 0.9623                                 | 0.9889                                 |
| Vanilla T <sup>2</sup> Net [25] | 0.2743 | 0.1674    | 0.0806   | 0.3674 | 0.0843     | 0.7996                               | 0.9643                                 | 0.9890                                 |
| CrDoCo [8]                      | 0.2629 | 0.1598    | 0.0741   | 0.3576 | 0.0826     | 0.8121                               | 0.9643                                 | 0.9885                                 |
| Feature Consistency             | 0.2881 | 0.1606    | 0.0831   | 0.4089 | 0.0902     | 0.7829                               | 0.9541                                 | 0.9836                                 |
| Ground-Truth Training           | 0.2168 | 0.1299    | 0.0592   | 0.3122 | 0.0725     | 0.8575                               | 0.9688                                 | 0.9897                                 |
| Ours                            | 0.2440 | 0.1420    | 0.0674   | 0.3498 | 0.0780     | 0.8351                               | 0.9657                                 | 0.9888                                 |

Table B.35: Full aggregated results for online adaptation in small scenes

| Method                          | MAE    | Abs. Rel. | Sq. Rel. | RMSE   | RMSE (Log) | Inlier Ratio<br>( $\lambda = 1.25$ ) | Inlier Ratio<br>( $\lambda = 1.25^2$ ) | Inlier Ratio<br>( $\lambda = 1.25^3$ ) |
|---------------------------------|--------|-----------|----------|--------|------------|--------------------------------------|----------------------------------------|----------------------------------------|
| No Adaptation                   | 0.5254 | 0.3275    | 0.3367   | 0.7433 | 0.1611     | 0.5327                               | 0.8073                                 | 0.9163                                 |
| Schneider et al. [22]           | 0.5562 | 0.3355    | 0.3704   | 0.7965 | 0.1669     | 0.4781                               | 0.7927                                 | 0.9177                                 |
| Tent [24]                       | 0.5076 | 0.3133    | 0.3088   | 0.7228 | 0.1585     | 0.5461                               | 0.8163                                 | 0.9216                                 |
| Flip Consistency                | 0.4524 | 0.2730    | 0.2106   | 0.6588 | 0.1417     | 0.5770                               | 0.8534                                 | 0.9439                                 |
| Mask Consistency                | 0.4701 | 0.2777    | 0.2259   | 0.6998 | 0.1472     | 0.5726                               | 0.8375                                 | 0.9348                                 |
| Photometric Consistency         | 0.5348 | 0.3445    | 0.3537   | 0.7358 | 0.1593     | 0.5238                               | 0.8095                                 | 0.9194                                 |
| Pseudo Labelling                | 0.4771 | 0.2821    | 0.2315   | 0.7014 | 0.1488     | 0.5601                               | 0.8346                                 | 0.9349                                 |
| Vanilla T <sup>2</sup> Net [25] | 0.4665 | 0.3125    | 0.2742   | 0.6432 | 0.1483     | 0.5751                               | 0.8407                                 | 0.9332                                 |
| CrDoCo [8]                      | 0.4466 | 0.2570    | 0.2018   | 0.6819 | 0.1414     | 0.6054                               | 0.8504                                 | 0.9415                                 |
| Feature Consistency             | 0.6060 | 0.3031    | 0.3101   | 0.9231 | 0.2019     | 0.4586                               | 0.7172                                 | 0.8539                                 |
| Ground-Truth Training           | 0.3190 | 0.1985    | 0.1354   | 0.4767 | 0.1094     | 0.7300                               | 0.9134                                 | 0.9682                                 |
| Ours                            | 0.4402 | 0.2362    | 0.1878   | 0.6684 | 0.1452     | 0.5806                               | 0.8419                                 | 0.9428                                 |

Table B.36: Full aggregated results for online adaptation in camera rotations

| Method                          | MAE    | Abs. Rel. | Sq. Rel. | RMSE   | RMSE (Log) | Inlier Ratio<br>( $\lambda = 1.25$ ) | Inlier Ratio<br>( $\lambda = 1.25^2$ ) | Inlier Ratio<br>( $\lambda = 1.25^3$ ) |
|---------------------------------|--------|-----------|----------|--------|------------|--------------------------------------|----------------------------------------|----------------------------------------|
| No Adaptation                   | 0.5329 | 0.2800    | 0.3145   | 0.7810 | 0.1890     | 0.5648                               | 0.7812                                 | 0.8697                                 |
| Schneider et al. [22]           | 0.4277 | 0.2406    | 0.1831   | 0.5946 | 0.1106     | 0.6428                               | 0.9373                                 | 0.9801                                 |
| Tent [24]                       | 0.5126 | 0.2670    | 0.2860   | 0.8028 | 0.1938     | 0.5829                               | 0.7914                                 | 0.8772                                 |
| Flip Consistency                | 0.4357 | 0.2346    | 0.1864   | 0.6433 | 0.1450     | 0.6331                               | 0.8665                                 | 0.9319                                 |
| Mask Consistency                | 0.5178 | 0.2528    | 0.2424   | 0.7889 | 0.1750     | 0.5784                               | 0.7921                                 | 0.8851                                 |
| Photometric Consistency         | 0.4533 | 0.2537    | 0.2450   | 0.6941 | 0.1634     | 0.6299                               | 0.8456                                 | 0.9163                                 |
| Pseudo Labelling                | 0.3995 | 0.2134    | 0.1594   | 0.6116 | 0.1331     | 0.6853                               | 0.8834                                 | 0.9448                                 |
| Vanilla T <sup>2</sup> Net [25] | 0.3731 | 0.2216    | 0.1649   | 0.5460 | 0.1264     | 0.7014                               | 0.9014                                 | 0.9554                                 |
| CrDoCo [8]                      | 0.4582 | 0.2349    | 0.1978   | 0.6924 | 0.1495     | 0.6270                               | 0.8460                                 | 0.9207                                 |
| Feature Consistency             | 0.4329 | 0.2269    | 0.1780   | 0.6653 | 0.1418     | 0.6363                               | 0.8647                                 | 0.9400                                 |
| Ground-Truth Training           | 0.2370 | 0.1391    | 0.0800   | 0.3712 | 0.0868     | 0.8339                               | 0.9484                                 | 0.9799                                 |
| Ours                            | 0.3143 | 0.1614    | 0.1074   | 0.5047 | 0.1067     | 0.7701                               | 0.9262                                 | 0.9681                                 |

Table B.37: Full aggregated results for online adaptation in Gaussian noise

| Method                          | MAE    | Abs. Rel. | Sq. Rel. | RMSE   | RMSE (Log) | Inlier Ratio<br>( $\lambda = 1.25$ ) | Inlier Ratio<br>( $\lambda = 1.25^2$ ) | Inlier Ratio<br>( $\lambda = 1.25^3$ ) |
|---------------------------------|--------|-----------|----------|--------|------------|--------------------------------------|----------------------------------------|----------------------------------------|
| No Adaptation                   | 0.7756 | 0.4490    | 0.5792   | 1.0052 | 0.1773     | 0.3425                               | 0.7521                                 | 0.9078                                 |
| Schneider et al. [22]           | 0.4261 | 0.2369    | 0.1779   | 0.5956 | 0.1098     | 0.6539                               | 0.9381                                 | 0.9815                                 |
| Tent [24]                       | 0.7220 | 0.4178    | 0.5058   | 0.9506 | 0.1706     | 0.3835                               | 0.7831                                 | 0.9205                                 |
| Flip Consistency                | 0.4734 | 0.2967    | 0.2072   | 0.5884 | 0.1308     | 0.4963                               | 0.8950                                 | 0.9699                                 |
| Mask Consistency                | 0.4774 | 0.3051    | 0.2158   | 0.5936 | 0.1344     | 0.4798                               | 0.8873                                 | 0.9661                                 |
| Photometric Consistency         | 0.8657 | 0.5226    | 0.7008   | 1.0652 | 0.1971     | 0.2345                               | 0.6882                                 | 0.8811                                 |
| Pseudo Labelling                | 0.4986 | 0.3126    | 0.2261   | 0.6096 | 0.1349     | 0.4602                               | 0.8883                                 | 0.9669                                 |
| Vanilla T <sup>2</sup> Net [25] | 0.6058 | 0.3934    | 0.3772   | 0.7499 | 0.1620     | 0.4217                               | 0.8026                                 | 0.9305                                 |
| CrDoCo [8]                      | 0.4115 | 0.2596    | 0.1652   | 0.5325 | 0.1204     | 0.5917                               | 0.9140                                 | 0.9739                                 |
| Feature Consistency             | 0.5007 | 0.2508    | 0.2244   | 0.7620 | 0.1569     | 0.5712                               | 0.8241                                 | 0.9196                                 |
| Ground-Truth Training           | 0.2512 | 0.1471    | 0.0855   | 0.3762 | 0.0830     | 0.8272                               | 0.9555                                 | 0.9855                                 |
| Ours                            | 0.3514 | 0.2034    | 0.1313   | 0.4896 | 0.1029     | 0.7025                               | 0.9395                                 | 0.9815                                 |

Table B.38: Full aggregated results for online adaptation in salt and pepper noise

| Method                          | MAE    | Abs. Rel. | Sq. Rel. | RMSE   | RMSE (Log) | Inlier Ratio<br>( $\lambda = 1.25$ ) | Inlier Ratio<br>( $\lambda = 1.25^2$ ) | Inlier Ratio<br>( $\lambda = 1.25^3$ ) |
|---------------------------------|--------|-----------|----------|--------|------------|--------------------------------------|----------------------------------------|----------------------------------------|
| No Adaptation                   | 0.5287 | 0.2896    | 0.3265   | 0.7612 | 0.1785     | 0.5574                               | 0.7953                                 | 0.8889                                 |
| Schneider et al. [22]           | 0.4343 | 0.2437    | 0.1843   | 0.6044 | 0.1119     | 0.6368                               | 0.9342                                 | 0.9795                                 |
| Tent [24]                       | 0.5061 | 0.2740    | 0.2866   | 0.7680 | 0.1799     | 0.5765                               | 0.8074                                 | 0.8975                                 |
| Flip Consistency                | 0.4900 | 0.2629    | 0.2202   | 0.6904 | 0.1578     | 0.5531                               | 0.8334                                 | 0.9189                                 |
| Mask Consistency                | 0.4329 | 0.2357    | 0.1770   | 0.6344 | 0.1362     | 0.6195                               | 0.8784                                 | 0.9490                                 |
| Photometric Consistency         | 0.5152 | 0.3087    | 0.3929   | 0.7742 | 0.1784     | 0.5842                               | 0.8155                                 | 0.8960                                 |
| Pseudo Labelling                | 0.4090 | 0.2336    | 0.1734   | 0.6000 | 0.1306     | 0.6469                               | 0.8951                                 | 0.9570                                 |
| Vanilla T <sup>2</sup> Net [25] | 0.3907 | 0.2388    | 0.1782   | 0.5495 | 0.1257     | 0.6660                               | 0.9057                                 | 0.9621                                 |
| CrDoCo [8]                      | 0.4298 | 0.2324    | 0.1736   | 0.6377 | 0.1346     | 0.6311                               | 0.8803                                 | 0.9496                                 |
| Feature Consistency             | 0.4346 | 0.2324    | 0.1786   | 0.6545 | 0.1395     | 0.6190                               | 0.8715                                 | 0.9466                                 |
| Ground-Truth Training           | 0.2428 | 0.1436    | 0.0822   | 0.3743 | 0.0862     | 0.8303                               | 0.9539                                 | 0.9831                                 |
| Ours                            | 0.2990 | 0.1653    | 0.0996   | 0.4604 | 0.0974     | 0.7844                               | 0.9456                                 | 0.9799                                 |

Table B.39: Full aggregated results for online adaptation in speckle noise
